# Supplementary material
Source: PubMed Central journal article supplement (PMC3276664)
Supplement: mmc1.pdf [file mmc1.pdf]

**The American Journal of Human Genetics, Volume 90**

**Supplemental Data**

**DNA Methylation Signatures in Development  
and Aging of the Human Prefrontal Cortex**

**Shusuke Numata, Tianzhang Ye, Thomas M. Hyde, Xavier Guitart-Navarro, Ran Tao, Michael Winger, Carlo Colantuoni, Daniel R. Weinberger, Joel E. Kleinman, and Barbara K. Lipska**

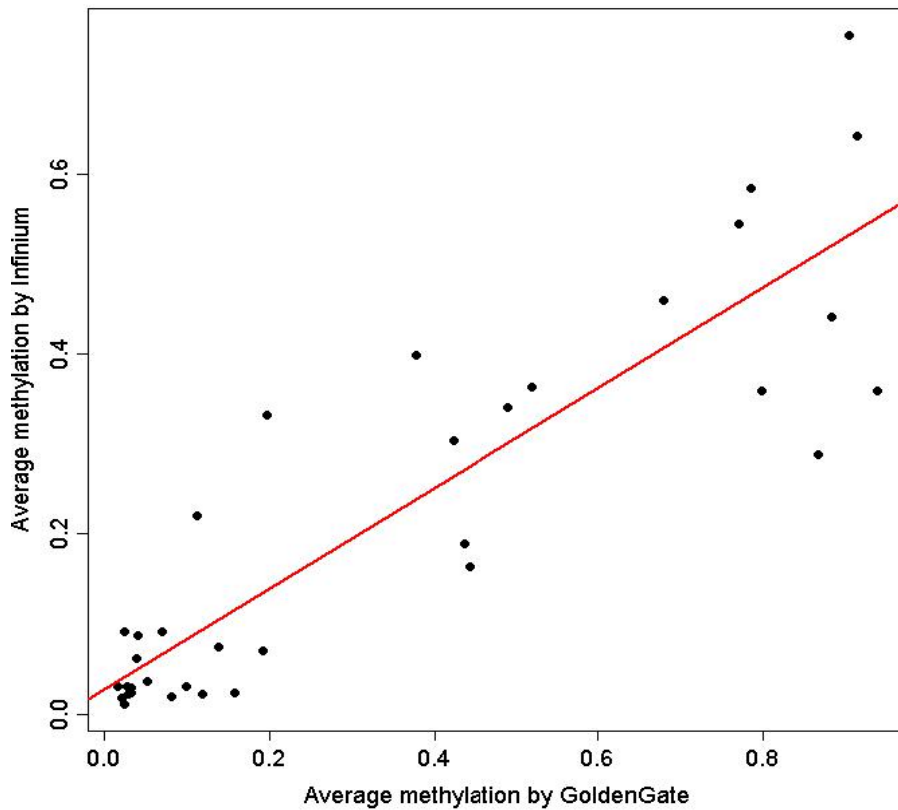

**Figure S1. Validation of DNA Methylation by Illumina GoldenGate Assay**

The x axis represents the mean methylation levels of 92 samples at 34 CpG sites using Illumina GoldenGate assay. The y axis represents the mean DNA methylation levels of the same samples at the same CpG sites using Illumina Infinium assay. A high correlation between the two platforms ( $r^2=0.79$ ) was observed.

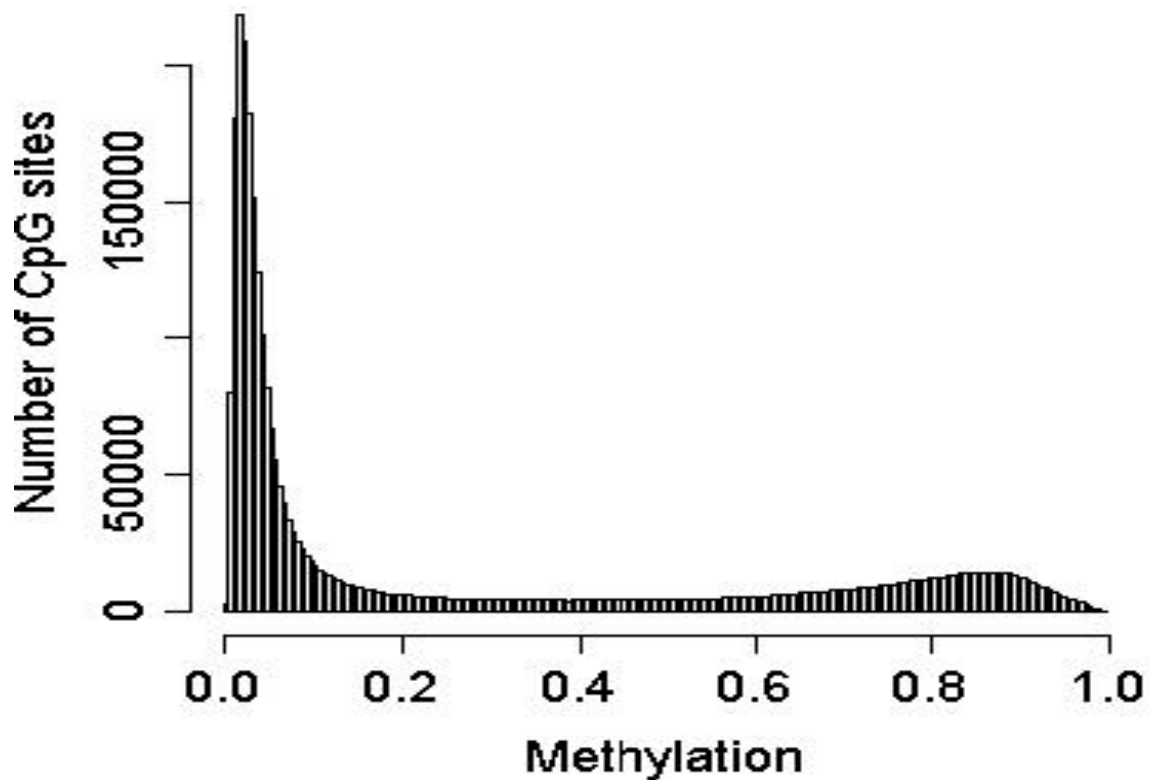

**Figure S2. DNA Methylation Levels across All Samples and all CpG Sites**

The x axis of the histogram represents the methylation levels (beta values = the ratios of signal from a methylated probe relative to the sum of both methylated and unmethylated probes). The y axis represents the number of CpG sites. The DNA methylation levels across all samples (N = 108) and all the methylation sites (N = 27,578) showed a bimodal distribution with 63.3% of loci hypomethylated ( $\beta < 0.2$ ), 13% of loci hypermethylated ( $\beta > 0.8$ ).

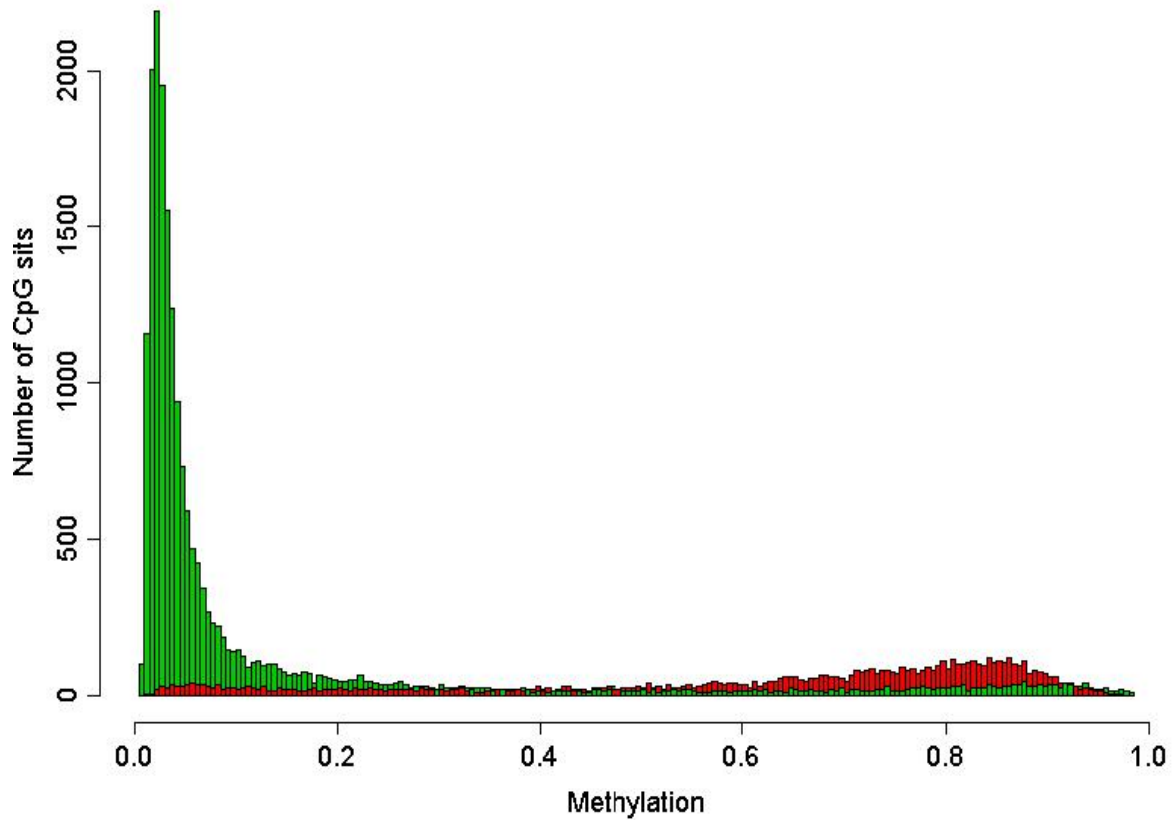

**Figure S3. DNA Methylation in CpG Islands (CGIs) and Non-CpG Islands**

The x axis represents the mean methylation levels of 108 samples. The y axis represents the number of CpG sites (total 27,578 CpG sites). CpG sites in CGIs are colored green and CpG sites in non-CGIs are colored red. The mean methylation levels of sites in non-CGIs were significantly higher than the sites in CGIs.

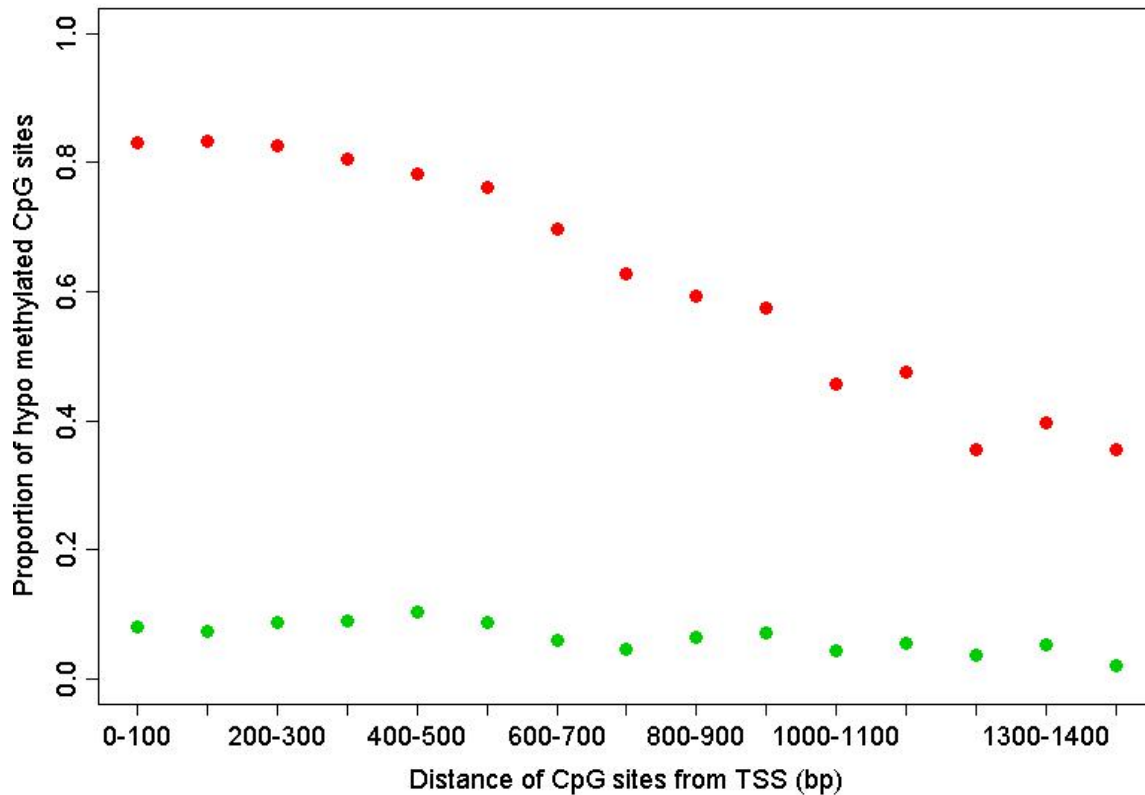

**Figure S4. Relationship between Methylation and the Distance from Transcription Start Sites (TSS)**

The x axis represents the distance of CpG site (in base pairs) from TSS. The y axis represents the proportion of hypomethylated CpG sites ( $\beta < 0.2$ ). CpG sites in CpG islands (CGIs) are colored red and CpG sites in non-CGIs are colored green. The longer the distance the higher was the proportion of hyper-methylated CpG sites located in CGIs. No such relationship was observed for the CpG sites in non-CGIs.

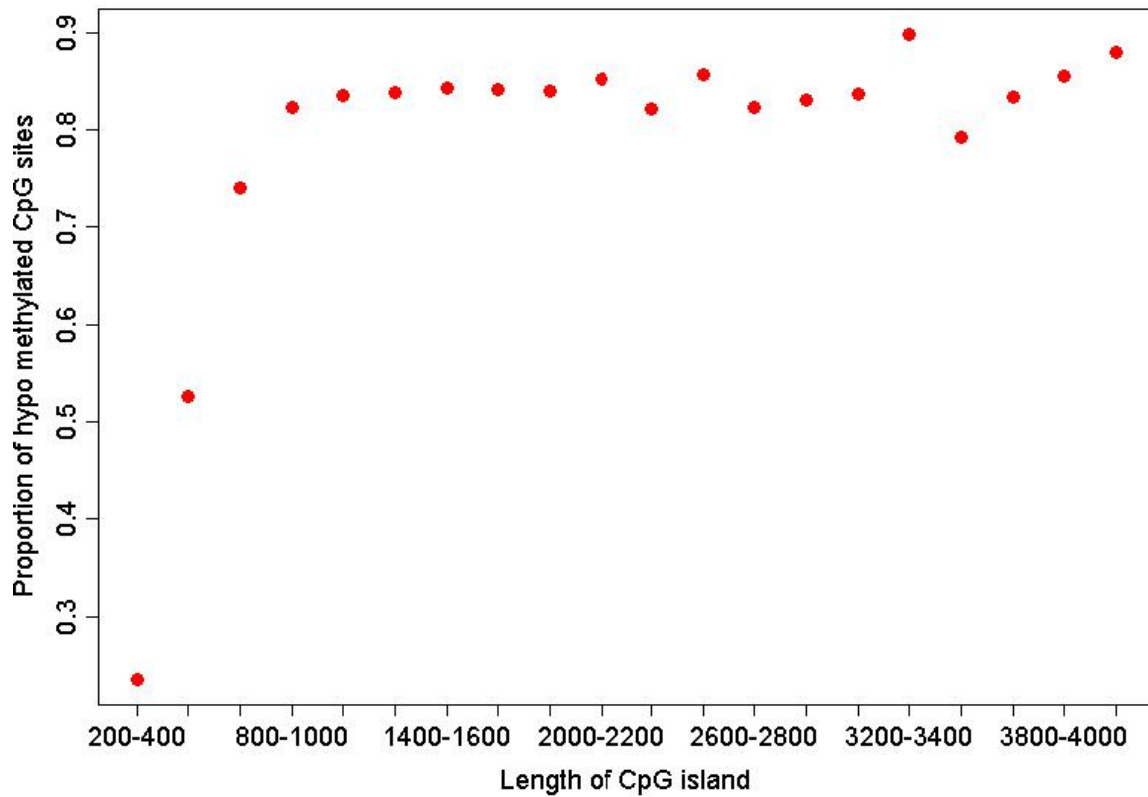

**Figure S5. Relationship between Methylation and the Length of CpG Islands**

The x axis represents the length of CpG islands (CGIs) in base pairs. The y axis represents the proportion of hypomethylated CpG sites ( $\beta < 0.2$ ). A relatively higher proportion of hypo-methylated CpG sites were observed in larger CGIs as compared to small CGIs (< 1,000 bp).

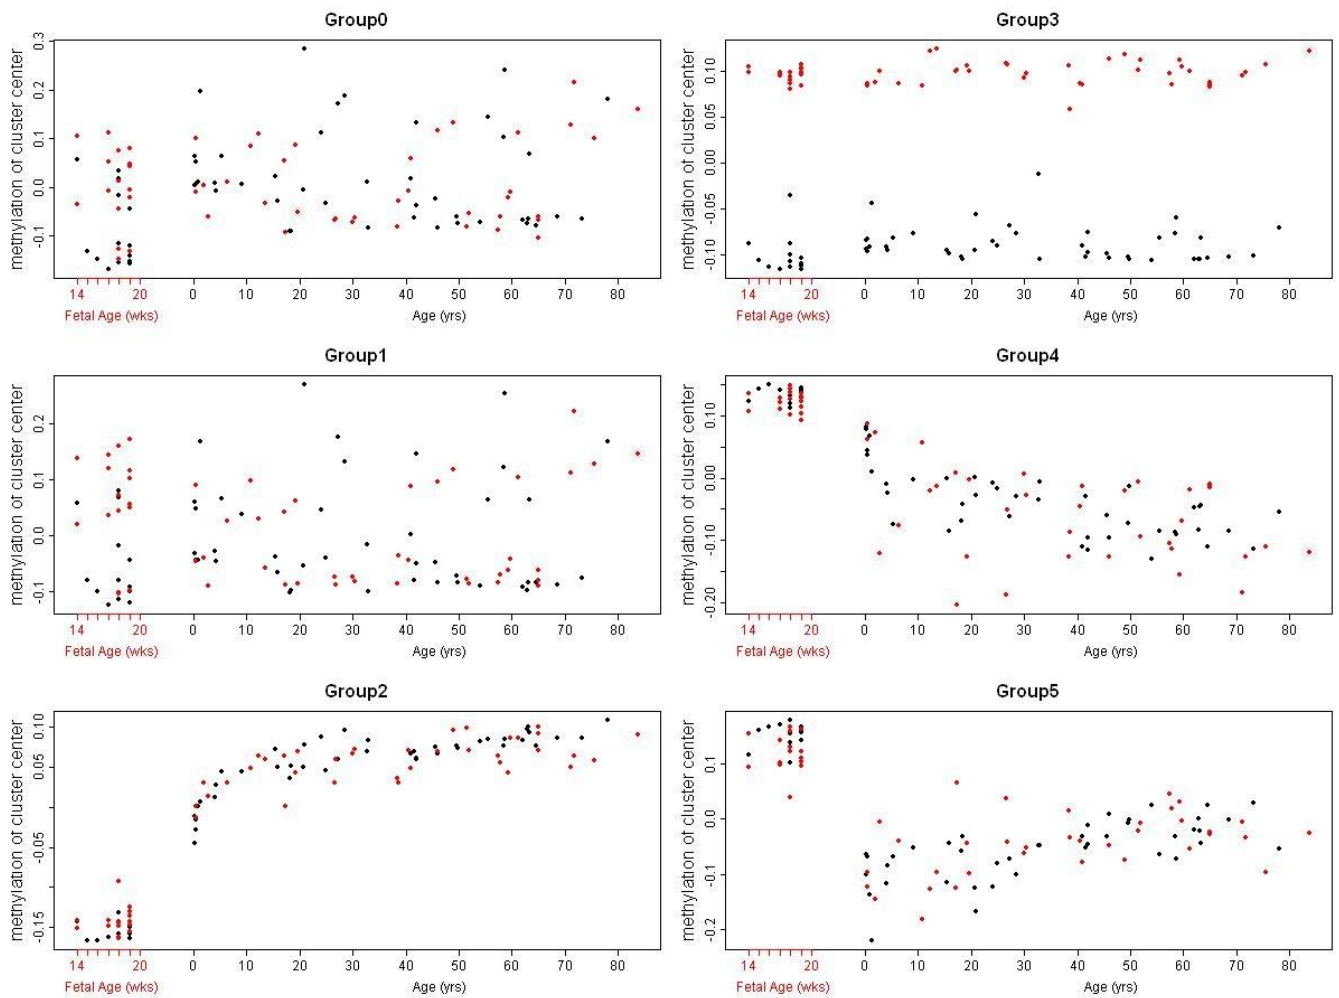

**Figure S6. Module-Specific Patterns of DNA Methylation during the Lifespan**

Group 0 contains all unclassified loci. Groups 1-5 contain loci classified according to weighted correlation network analysis (WGCNA). X axis represents age (fetal age in gestational weeks, postnatal age in years), Y axis represents methylation in the arbitrary units with 0 corresponding to the methylation status of the module center.

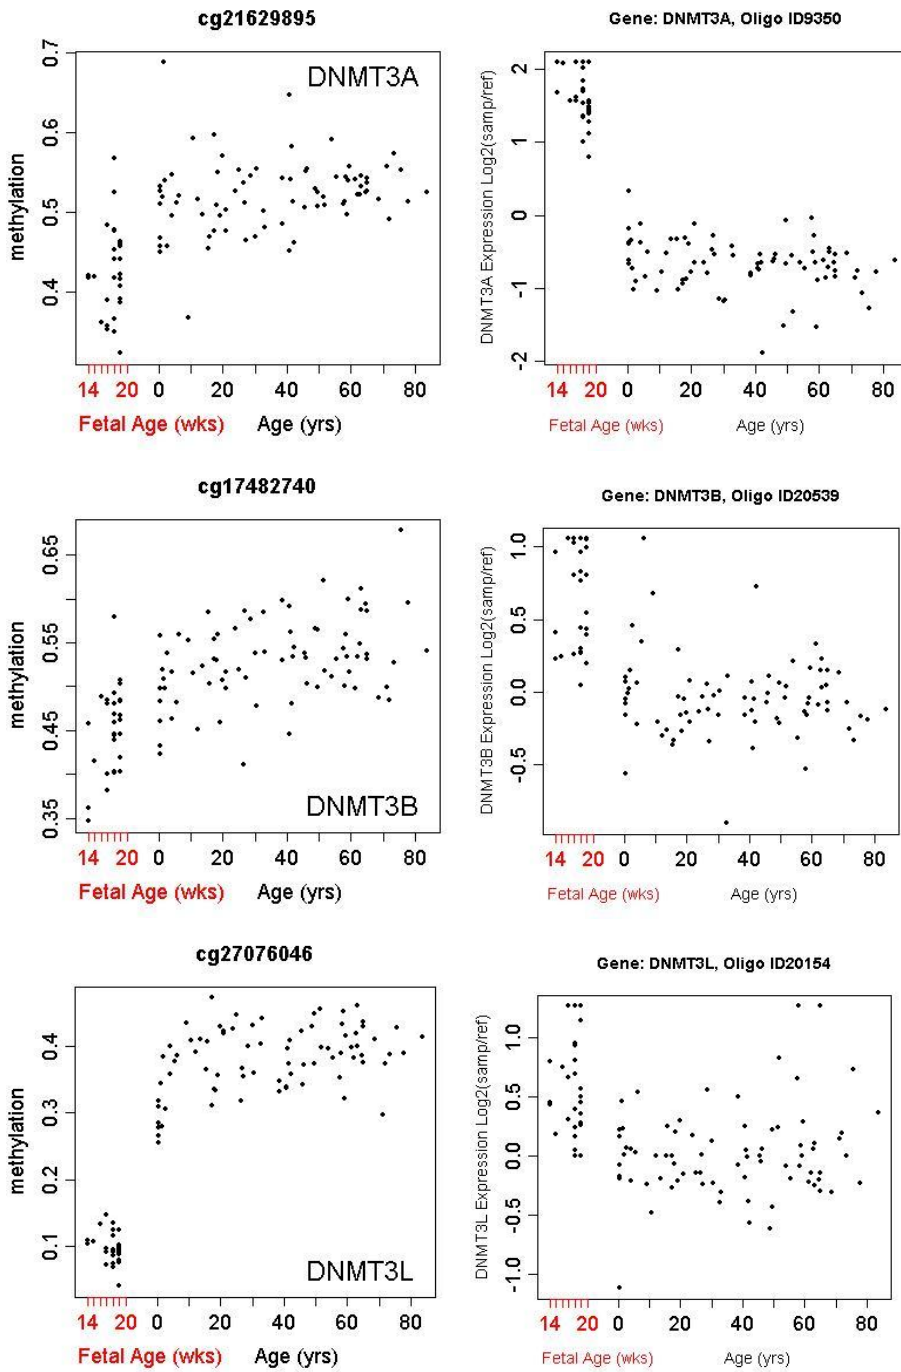

**Figure S7. DNA Methylation (Panels on the Left Side) and Expression (Right Side) Patterns of DNMT3 Genes**



Expression levels of DNMT3A, DNMT3B and DNMT3L are high in fetal samples and drop by birth, whereas DNA methylation increases from the fetal period to postnatal life. There is a significant inverse correlation between expression and methylation for all three genes ( $p < 10^{-6}$ ).

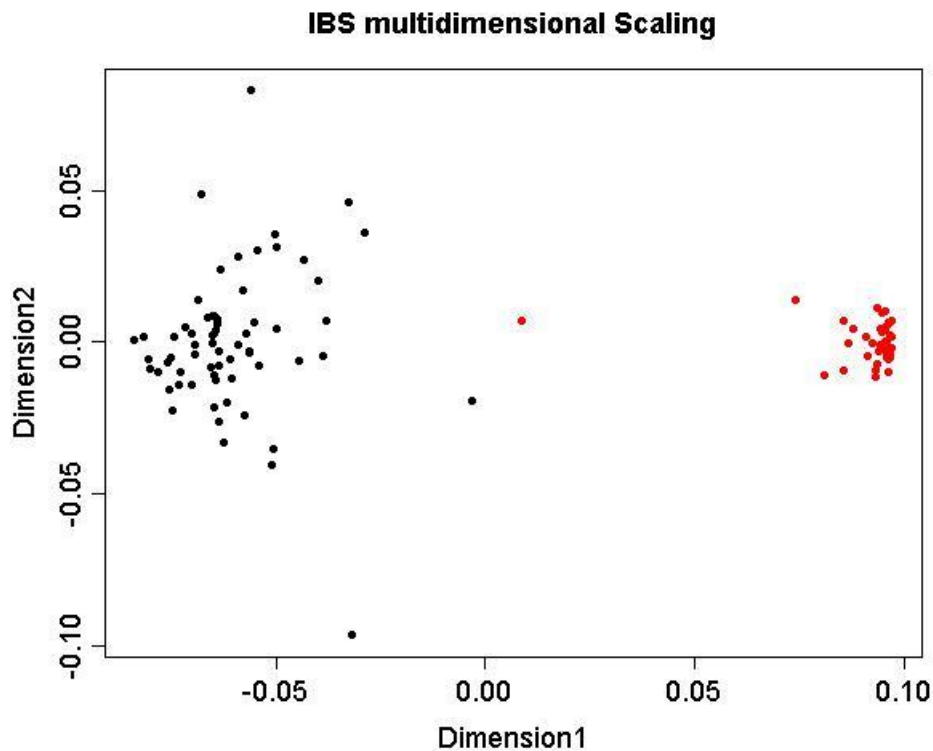

**Figure S8. Multidimensional Scaling Plot Visualizing Genetic Structure of the Cohort**

In the Identity-by-state plot in PLINK using 605,371 genotypic markers in all 108 subjects included in the study, two distinct clusters were identified, corresponding to Caucasians (red dots) and African Americans (black dots). One outlier (a red dot in the center of the graph) was removed from mQTL analysis.

A.

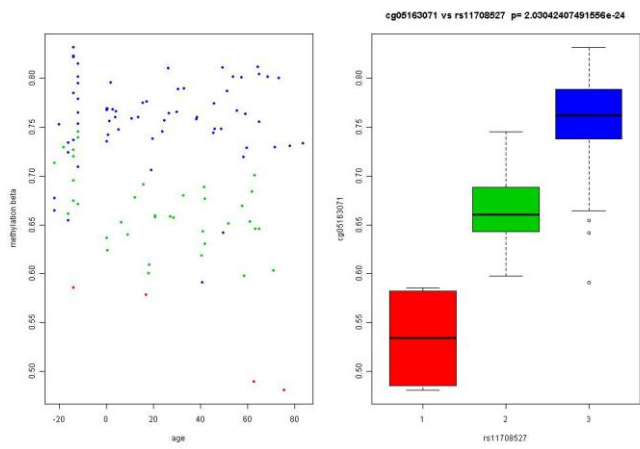

B.

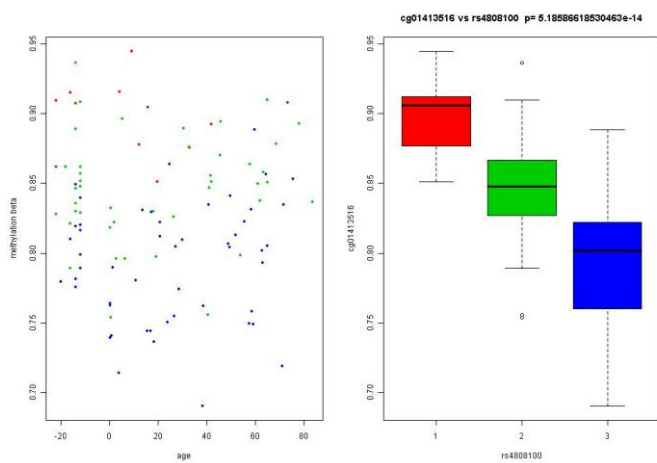

C.

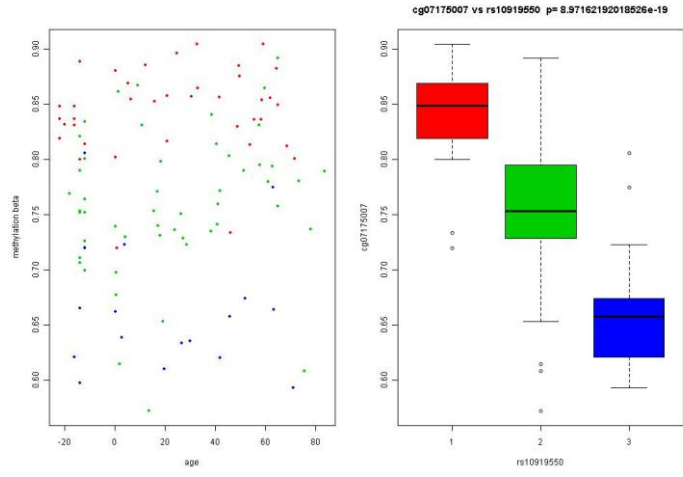

D.

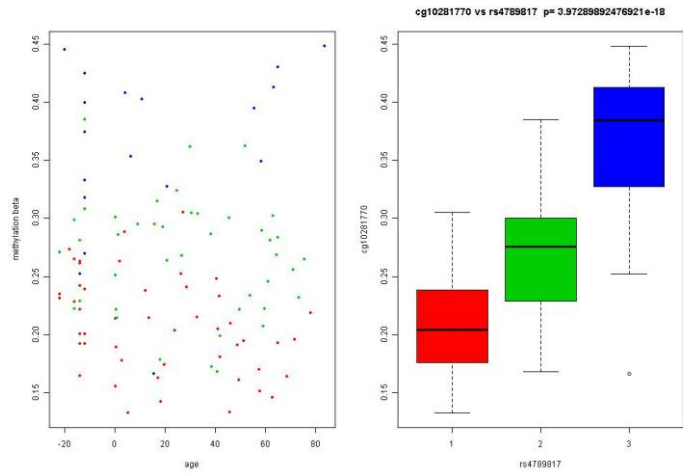

E.

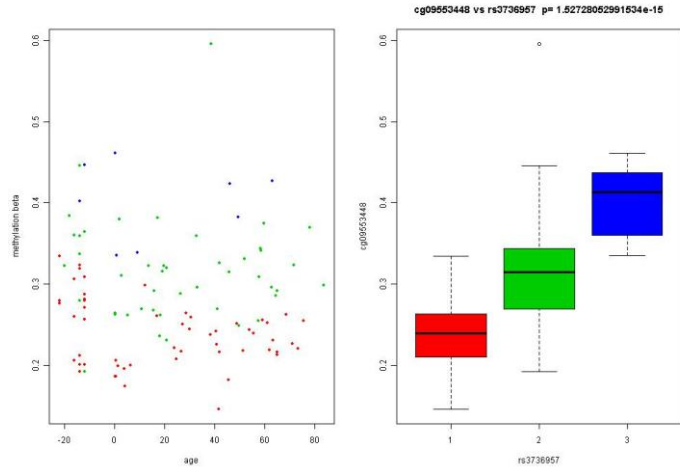

F.

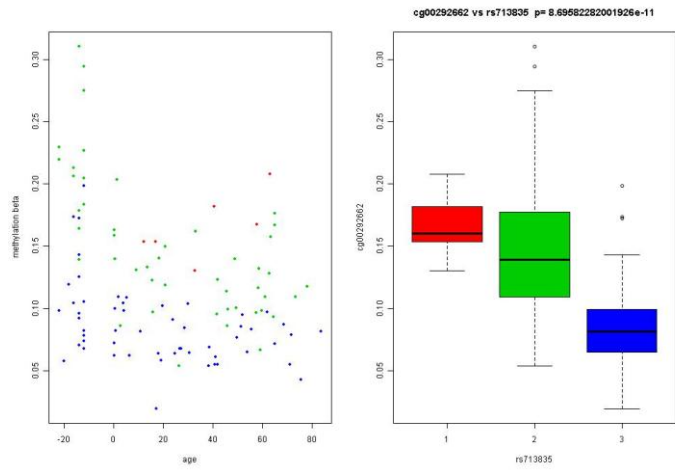

G.

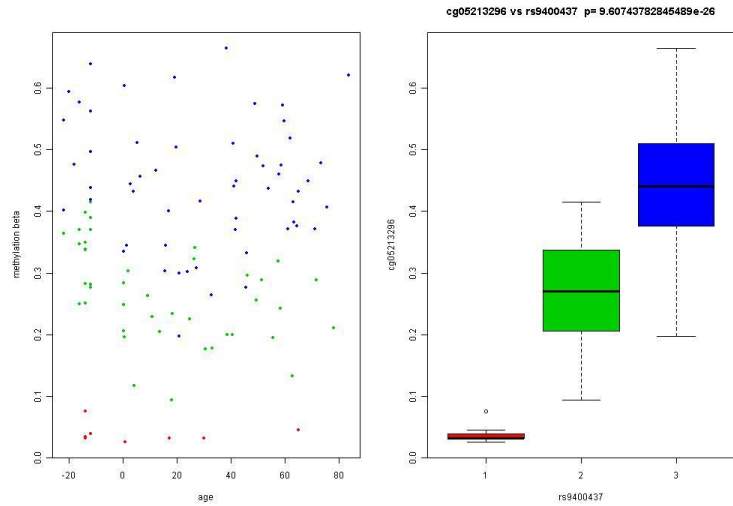

**Figure S9. Examples of SNP-DNA Methylation Associations across the Lifespan**

The differences in DNA methylation between the genotypic groups are consistent and apparent across the entire lifespan as shown in the scatterplots. Associations between A) *RETNLB* (cg05163071) and rs11708527 in *RETNLB*; B) *INSL3* (cg01413516) and rs4808100 in *INSL3*; C) *UHMK1* (cg07175007) and rs10919550 in *UHMK1*; D) *WDR45L* (cg10281770) and rs4789817 in *WDR45L*; E) *NUP214* (cg09553448) and rs3736957 in *NUP214*; F) *LGALS1* (cg00292662) and rs713835 in *CRYBB3* (located on the same chromosome as *LGALS1*); G) *BXDC1* (cg05213296) and rs9400437 in *GTF3C6* (located in the proximity of *BXDC1*).

A.

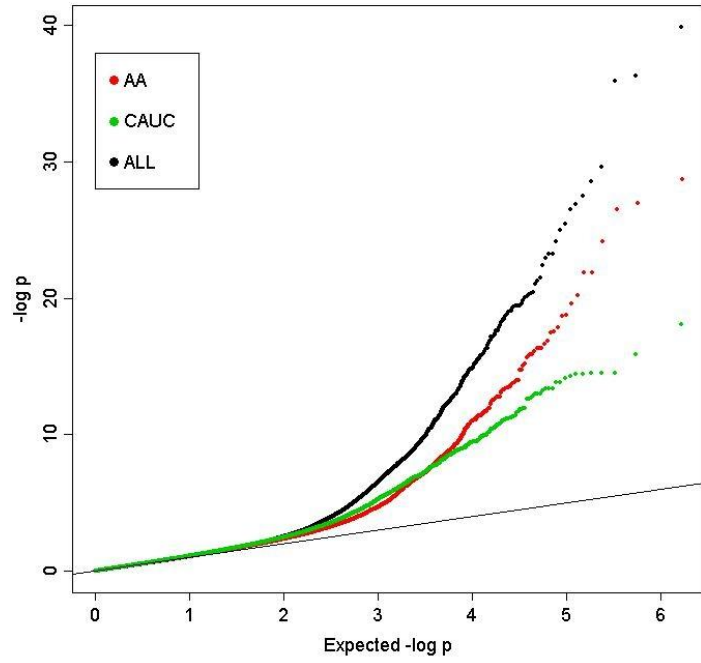

B.

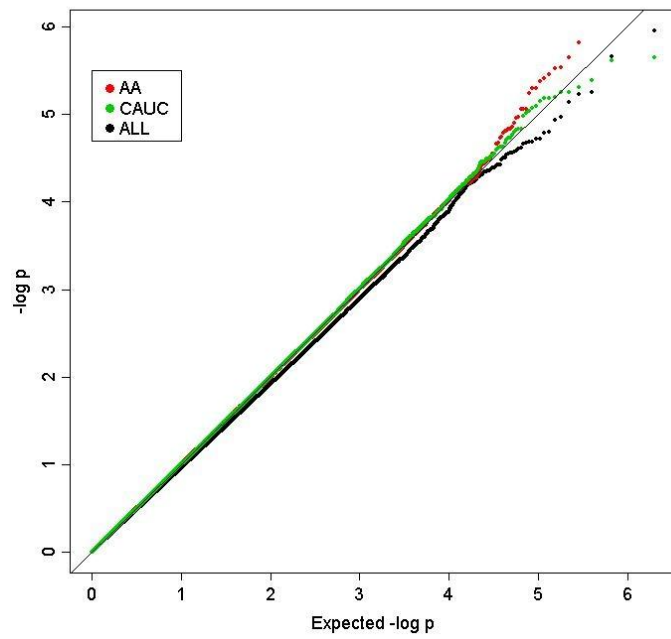

### Figure S10. Q-Q Plots of Observed versus Expected Association Strength

(A) All *cis*-associations (1.07 million). Both plots show analysis of associations across all samples (black), as well as within African American (red) and Caucasian (green) samples separately. (B) One million randomly selected associations across all possible associations (*cis*- and *trans*-). The expected  $-\log p$  was calculated as:  $-\log_{10}[(i-0.5)/n]$  where  $i$  takes on values from 1 –  $n$ ; creating a uniform distribution of expected  $p$  values. Vertical departure of the fits from the black identity line indicates abundances of extreme  $p$  values among the observed associations.



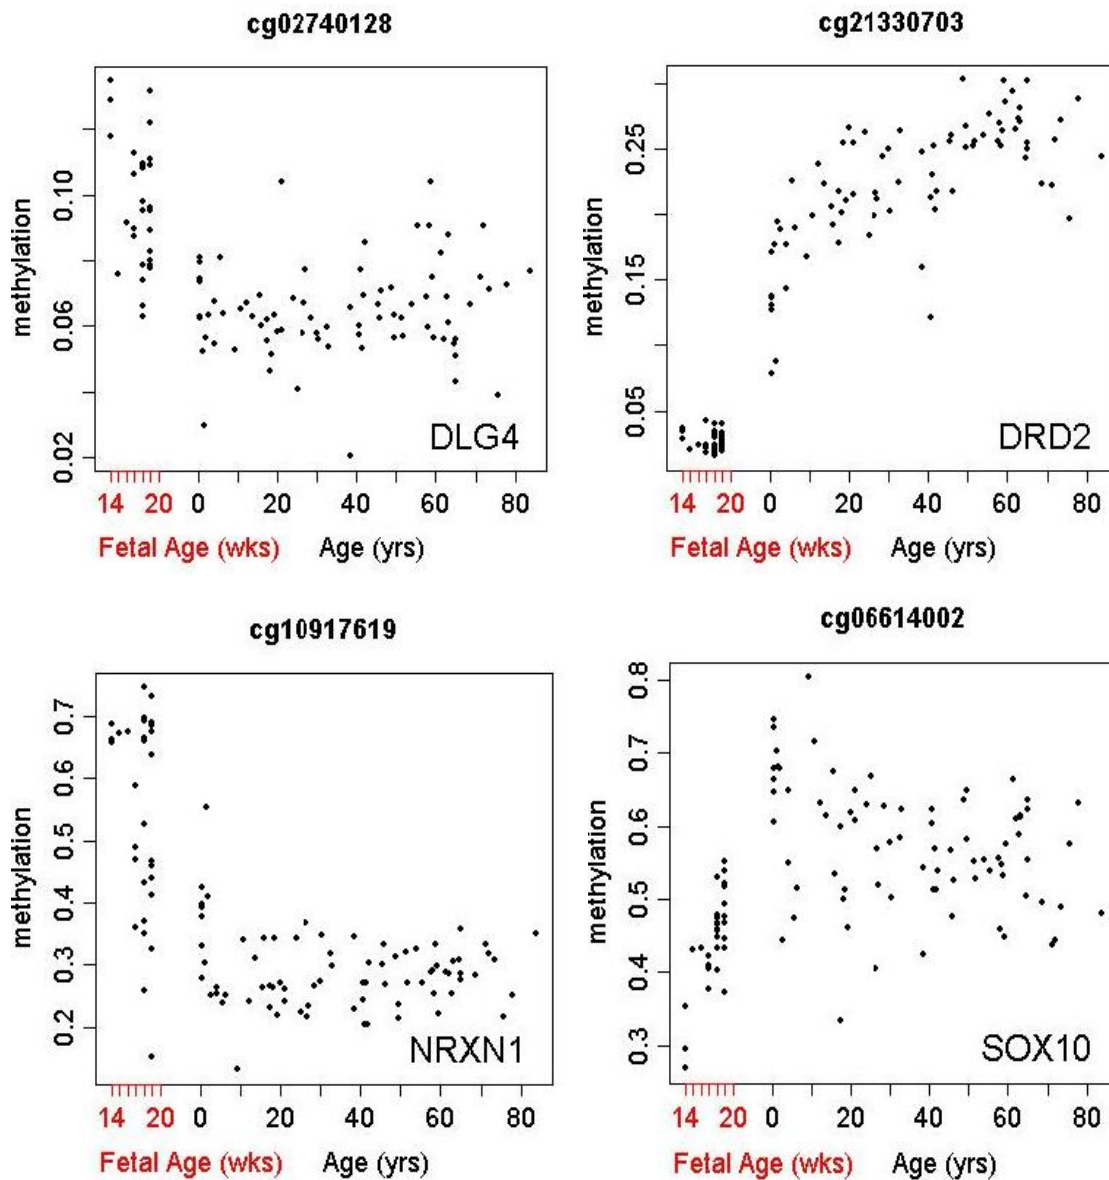

**Figure S11. Age-Related Methylation Changes in DLG4, DRD2, NRXN1, and SOX10**

The x axis represents age, and the y axis represents DNA methylation levels. The CpG site in DLG4 (cg02740128) showed a significant age-related decrease during

the fetal period ( $p = 3.6 \times 10^{-4}$ ). The CpG site in DRD2 (cg21330703) showed significant age-related increases during childhood and in older ages ( $p = 2.4 \times 10^{-4}$  and  $p = 2.2 \times 10^{-5}$ , respectively). The CpG site in NRXN1 (cg10917619) showed significant age-related decreases during the fetal period and childhood ( $p = 4.2 \times 10^{-4}$  and  $p = 1.0 \times 10^{-3}$ , respectively). The CpG site in SOX10 (cg06614002) showed a significant age-related increase during the fetal period ( $p = 1.2 \times 10^{-6}$ ) and decreases during childhood and in older ages ( $p = 1.3 \times 10^{-5}$  and  $p = 1.1 \times 10^{-4}$ , respectively).

**Table S1. Demographic Data**

| Subject | PMI  | Sex | Race | Nicotine | pH   | MannerOfDeath | Age (years) |
|---------|------|-----|------|----------|------|---------------|-------------|
| 1       | 33.5 | F   | CAUC | No       | 6.49 | Accident      | 83.64       |
| 2       | 21.5 | M   | CAUC | No       | 6.87 | Natural       | 77.99       |
| 3       | 50   | F   | CAUC | No       | 6.26 | Natural       | 75.57       |
| 4       | 68.5 | M   | AA   | Yes      | 6.41 | Natural       | 73.28       |
| 5       | 25   | F   | AA   | No       | 6.47 | Natural       | 71.82       |
| 6       | 23.5 | F   | CAUC | No       | 6.16 | Natural       | 71.11       |
| 7       | 58   | M   | AA   | No       | 6.72 | Natural       | 68.59       |
| 8       | 57.5 | F   | AA   | No       | 6.57 | Natural       | 65.04       |
| 9       | 28.5 | F   | AA   | Yes      | 6.65 | Natural       | 64.96       |
| 10      | 52.5 | F   | AA   | No       | 6.83 | Natural       | 64.91       |
| 11      | 53.5 | M   | AA   | No       | 6.57 | Natural       | 64.56       |
| 12      | 26   | M   | CAUC | No       | 6.74 | Natural       | 63.24       |
| 13      | 45.5 | M   | CAUC | No       | 6.2  | Accident      | 63.00       |
| 14      | 37   | M   | AA   | No       | 6.79 | Natural       | 62.78       |
| 15      | 19.5 | M   | CAUC | Yes      | 6.27 | Natural       | 61.96       |
| 16      | 24.5 | F   | CAUC | No       | 5.73 | Natural       | 61.19       |
| 17      | 37   | F   | AA   | Yes      | 6.64 | Natural       | 59.62       |
| 18      | 22   | F   | CAUC | No       | 6.31 | Natural       | 59.26       |
| 19      | 64   | M   | CAUC | Yes      | 6.87 | Natural       | 58.61       |
| 20      | 50   | M   | AA   | No       | 5.96 | Natural       | 58.44       |
| 21      | 45.5 | F   | AA   | No       | 6    | Natural       | 57.87       |
| 22      | 29   | F   | CAUC | No       | 6.1  | Natural       | 57.48       |
| 23      | 29.5 | M   | CAUC | No       | 6.69 | Natural       | 55.44       |
| 24      | 32.5 | M   | AA   | No       | 6.76 | Natural       | 53.96       |
| 25      | 51.5 | F   | CAUC | No       | 6.53 | Natural       | 51.94       |
| 26      | 24   | F   | AA   | No       | 6.79 | Natural       | 51.48       |
| 27      | 51   | M   | AA   | No       | 6.83 | Natural       | 49.76       |
| 28      | 18.5 | M   | CAUC | No       | 6.57 | Natural       | 49.56       |
| 29      | 36   | F   | CAUC | No       | 6.47 | Natural       | 49.02       |
| 30      | 13   | F   | AA   | No       | 7.1  | Natural       | 46.10       |
| 31      | 38.5 | M   | AA   | No       | 6.66 | Homicide      | 45.94       |
| 32      | 43.5 | M   | CAUC | No       | 6.26 | Natural       | 45.68       |
| 33      | 24.5 | M   | CAUC | No       | 6.34 | Natural       | 42.07       |
| 34      | 24.5 | M   | AA   | No       | 7.08 | Natural       | 42.02       |
| 35      | 14.5 | M   | AA   | No       | 6.12 | Natural       | 41.58       |
| 36      | 18   | M   | CAUC | Yes      | 6.82 | Natural       | 41.04       |
| 37      | 40   | F   | AA   | Yes      | 6.17 | Natural       | 40.85       |

|    |      |   |      |     |      |          |       |
|----|------|---|------|-----|------|----------|-------|
| 38 | 28.5 | F | CAUC | No  | 6.1  | Natural  | 40.61 |
| 39 | 38.5 | F | AA   | Yes | 6.58 | Natural  | 38.61 |
| 40 | 41   | F | CAUC | No  | 6.76 | Homicide | 38.41 |
| 41 | 43   | M | AA   | No  | 6.62 | Natural  | 33.00 |
| 42 | 22.5 | M | CAUC | No  | 6.38 | Natural  | 32.70 |
| 43 | 32.5 | F | AA   | No  | 6.37 | Accident | 30.50 |
| 44 | 9.5  | F | CAUC | No  | 6.92 | Natural  | 30.04 |
| 45 | 7.5  | M | CAUC | No  | 6.85 | Natural  | 28.59 |
| 46 | 14   | M | AA   | No  | 6.37 | Homicide | 27.22 |
| 47 | 25   | F | AA   | No  | 5.99 | Homicide | 26.78 |
| 48 | 40   | F | CAUC | No  | 6.94 | Homicide | 26.53 |
| 49 | 14.5 | M | AA   | No  | 6.6  | Homicide | 24.85 |
| 50 | 20.5 | M | CAUC | Yes | 6.98 | Accident | 24.04 |
| 51 | 32   | M | CAUC | No  | 6.73 | Natural  | 20.86 |
| 52 | 25.5 | M | AA   | No  | 6.46 | Homicide | 20.79 |
| 53 | 19   | F | AA   | No  | 6.98 | Natural  | 19.71 |
| 54 | 9.5  | F | CAUC | No  | 5.91 | Natural  | 19.27 |
| 55 | 43.5 | M | CAUC | No  | 6.84 | Natural  | 18.42 |
| 56 | 36.5 | M | AA   | No  | 6.7  | Homicide | 18.16 |
| 57 | 15.5 | F | AA   | Yes | 6.77 | Homicide | 17.28 |
| 58 | 12   | F | CAUC | No  | 6.79 | Accident | 17.09 |
| 59 | 12   | M | CAUC | Yes | 6.52 | Accident | 15.80 |
| 60 | 14.5 | M | AA   | Yes | 6.93 | Homicide | 15.49 |
| 61 | 19.5 | F | AA   | No  | 6.34 | Homicide | 13.49 |
| 62 | 67.5 | F | CAUC | No  | 6.38 | Accident | 12.28 |
| 63 | 22   | F | AA   | No  | N/A  | Accident | 10.73 |
| 64 | 67.5 | M | CAUC | No  | 6.39 | Accident | 9.16  |
| 65 | 20   | F | CAUC | No  | 6.9  | Accident | 6.34  |
| 66 | 18   | M | CAUC | No  | 6.67 | Accident | 5.35  |
| 67 | 20   | M | AA   | No  | 6.52 | Natural  | 4.21  |
| 68 | 37   | M | CAUC | No  | 6.24 | Homicide | 3.98  |
| 69 | 44   | F | CAUC | No  | 6.06 | Accident | 2.72  |
| 70 | 21   | F | AA   | No  | 6.73 | Accident | 2.02  |
| 71 | 19   | M | CAUC | No  | 6.72 | Accident | 1.34  |
| 72 | 37.5 | M | AA   | No  | 6.57 | Natural  | 0.97  |
| 73 | 26   | F | CAUC | No  | 6.26 | Accident | 0.52  |
| 74 | 31.5 | F | AA   | No  | 6.77 | Natural  | 0.48  |
| 75 | 59.5 | M | AA   | No  | 6.27 | Accident | 0.41  |
| 76 | 27   | M | CAUC | No  | 6.51 | Natural  | 0.35  |
| 77 | 22   | M | CAUC | No  | 6.21 | Natural  | 0.33  |

|     |    |   |      |     |      |         |       |
|-----|----|---|------|-----|------|---------|-------|
| 78  | 61 | M | AA   | No  | 6.48 | Natural | 0.22  |
| 79  | 3  | F | AA   | No  | N/A  | N/A     | -0.40 |
| 80  | 1  | M | CAUC | Yes | N/A  | N/A     | -0.40 |
| 81  | 1  | F | AA   | Yes | N/A  | N/A     | -0.40 |
| 82  | 1  | M | AA   | No  | N/A  | N/A     | -0.40 |
| 83  | 3  | M | AA   | No  | N/A  | N/A     | -0.40 |
| 84  | 2  | M | AA   | No  | N/A  | N/A     | -0.40 |
| 85  | 2  | F | AA   | No  | N/A  | N/A     | -0.40 |
| 86  | 2  | F | AA   | No  | N/A  | N/A     | -0.40 |
| 87  | 2  | M | CAUC | No  | N/A  | N/A     | -0.40 |
| 88  | 8  | F | AA   | Yes | N/A  | N/A     | -0.40 |
| 89  | 3  | F | CAUC | No  | N/A  | N/A     | -0.40 |
| 90  | 1  | F | AA   | Yes | N/A  | N/A     | -0.42 |
| 91  | 1  | F | AA   | No  | N/A  | N/A     | -0.42 |
| 92  | 2  | F | AA   | Yes | N/A  | N/A     | -0.42 |
| 93  | 12 | M | AA   | No  | N/A  | N/A     | -0.42 |
| 94  | 4  | M | AA   | No  | N/A  | N/A     | -0.42 |
| 95  | 4  | M | AA   | No  | N/A  | N/A     | -0.42 |
| 96  | 3  | F | AA   | Yes | N/A  | N/A     | -0.42 |
| 97  | 6  | M | AA   | Yes | N/A  | N/A     | -0.42 |
| 98  | 1  | F | AA   | Yes | N/A  | N/A     | -0.42 |
| 99  | 1  | M | AA   | No  | N/A  | N/A     | -0.42 |
| 100 | 1  | F | AA   | No  | N/A  | N/A     | -0.44 |
| 101 | 2  | M | AA   | No  | N/A  | N/A     | -0.44 |
| 102 | 1  | F | AA   | No  | N/A  | N/A     | -0.44 |
| 103 | 4  | F | AA   | No  | N/A  | N/A     | -0.44 |
| 104 | 1  | M | AA   | Yes | N/A  | N/A     | -0.46 |
| 105 | 4  | M | AA   | No  | N/A  | N/A     | -0.48 |
| 106 | 1  | M | AA   | No  | N/A  | N/A     | -0.50 |
| 107 | 3  | F | AA   | No  | N/A  | N/A     | -0.50 |
| 108 | 1  | F | AA   | No  | N/A  | N/A     | -0.50 |

**Table S2A. Top One Hundred Most Significant CpG Loci Showing Changes in DNA Methylation during the Fetal Period**

| CpG locus  | Chr | Gene Symbol | CPG_ISLAND<br>(1 denotes<br>in CGIs and<br>0 denotes in<br>non-CGIs) | beta<br>regression<br>coefficient | p value  |
|------------|-----|-------------|----------------------------------------------------------------------|-----------------------------------|----------|
| cg09398185 | 10  | IFIT2       | 0                                                                    | 3.6309342                         | 8.62E-30 |
| cg08399444 | 12  | GSG1        | 0                                                                    | 3.6906079                         | 7.73E-28 |
| cg06353720 | 10  | IFIT3       | 0                                                                    | 3.5812806                         | 5.21E-21 |
| cg06476606 | 10  | IFIT2       | 0                                                                    | 1.9048426                         | 2.27E-20 |
| cg16692277 | 13  | GUCY1B2     | 1                                                                    | 3.7688943                         | 1.24E-17 |
| cg09494546 | 1   | SLC16A4     | 0                                                                    | 3.2890392                         | 2.88E-16 |
| cg00075967 | 15  | STRA6       | 0                                                                    | 2.9868582                         | 6.32E-16 |
| cg06426831 | 1   | SLC35A3     | 1                                                                    | 1.2661272                         | 8.70E-16 |
| cg22740835 | 1   | DDR2        | 0                                                                    | 2.2377317                         | 6.08E-15 |
| cg25599242 | 11  | RARRES3     | 0                                                                    | 1.6785498                         | 1.09E-14 |
| cg18201077 | 2   | RSAD2       | 0                                                                    | 1.9317723                         | 1.60E-14 |
| cg04761824 | 9   | 1-Dec       | 0                                                                    | -2.907676                         | 8.13E-14 |
| cg06142324 | 11  | FLJ25530    | 1                                                                    | 3.1366541                         | 1.30E-13 |
| cg21048669 | 16  | CLEC3A      | 0                                                                    | 1.7707384                         | 1.69E-13 |
| cg02456292 | 19  | FLJ90805    | 1                                                                    | 0.6820287                         | 3.15E-13 |
| cg19530885 | 5   | SCGB3A2     | 0                                                                    | 2.3974417                         | 4.54E-13 |
| cg17749384 | 10  | MPP7        | 0                                                                    | 0.9687017                         | 5.20E-13 |
| cg19447496 | 13  | RB1         | 1                                                                    | 0.8377441                         | 9.12E-13 |
| cg17204557 | 2   | FLJ14816    | 1                                                                    | 1.4735331                         | 3.01E-12 |
| cg07823755 | 2   | UGT1A1      | 0                                                                    | 2.8095304                         | 6.20E-12 |

|            |    |           |   |           |          |
|------------|----|-----------|---|-----------|----------|
| cg09195271 | 1  | RNF186    | 0 | 0.8365116 | 7.39E-12 |
| cg18003231 | 22 | SLC25A18  | 1 | 3.3141259 | 1.94E-11 |
| cg12697789 | 4  | TLR3      | 0 | 0.9629027 | 2.09E-11 |
| cg19620294 | 8  | TNFRSF11B | 1 | 1.0010442 | 2.14E-11 |
| cg03622431 | 1  | DNASE2B   | 0 | 2.2920245 | 2.44E-11 |
| cg13112511 | 5  | PDE4D     | 0 | 1.9857987 | 4.52E-11 |
| cg03296929 | 4  | IBSP      | 0 | 1.6303843 | 6.12E-11 |
| cg24646513 | 12 | MTERFD3   | 1 | 0.5250633 | 1.99E-10 |
| cg09425611 | 16 | CES1      | 0 | 1.9217543 | 2.53E-10 |
| cg24389347 | 3  | C3orf22   | 0 | 1.5673401 | 3.05E-10 |
| cg01446692 | 9  | CER1      | 0 | 1.4583827 | 4.31E-10 |
| cg01636591 | 17 | CCL8      | 0 | 2.1040586 | 4.90E-10 |
| cg01305421 | 12 | IGF1      | 0 | 2.2779757 | 5.95E-10 |
| cg04999691 | 7  | C7orf29   | 0 | 1.9076787 | 6.00E-10 |
| cg17238009 | 10 | C10orf11  | 1 | 2.5257245 | 6.68E-10 |
| cg16948369 | X  | KLHL4     | 0 | 1.2928321 | 6.73E-10 |
| cg24471894 | 9  | KIAA0020  | 0 | 1.5217802 | 8.49E-10 |
| cg02774160 | 22 | GGT1      | 0 | 1.6007604 | 1.06E-09 |
| cg22168676 | 6  | OFCC1     | 0 | 1.8867206 | 1.50E-09 |
| cg12108912 | 2  | MGC10993  | 1 | 1.4671126 | 2.40E-09 |
| cg03330678 | 17 | 9-Sep     | 1 | -1.935966 | 2.48E-09 |
| cg16698623 | 10 | MGMT      | 1 | 0.8695482 | 2.48E-09 |
| cg01511567 | 11 | SSRP1     | 1 | 1.1744267 | 2.86E-09 |
| cg21825364 | Y  | VCY       | 1 | 0.1954877 | 3.19E-09 |

|            |    |               |   |           |          |
|------------|----|---------------|---|-----------|----------|
| cg11484576 | 11 | LGALS12       | 0 | 2.0747302 | 3.37E-09 |
| cg07412254 | 2  | FLJ14816      | 1 | 1.203986  | 4.01E-09 |
| cg01041367 | 8  | TMEM70        | 1 | 0.5521116 | 4.29E-09 |
| cg24216701 | 5  | CDX1          | 1 | 0.9922836 | 5.09E-09 |
| cg17398283 | 1  | CCDC76        | 0 | 0.7091409 | 6.40E-09 |
| cg25140571 | 3  | OXTR          | 1 | 0.7987879 | 6.95E-09 |
| cg10313675 | 1  | C1orf74       | 1 | 0.0976426 | 8.41E-09 |
| cg03891319 | 3  | ACY1          | 1 | -0.75828  | 9.14E-09 |
| cg04394967 | 14 | RDH12         | 0 | 0.8971498 | 9.77E-09 |
| cg17489451 | 12 | DKFZP779L1558 | 0 | 1.5324891 | 9.85E-09 |
| cg11787522 | 15 | STRA6         | 0 | 1.2983386 | 9.99E-09 |
| cg23286660 | 1  | PLOD1         | 1 | 0.3979566 | 1.08E-08 |
| cg20955688 | 8  | TMEM71        | 0 | -1.747684 | 1.30E-08 |
| cg13668129 | 19 | HNRPUL1       | 1 | 0.7594149 | 1.37E-08 |
| cg17751569 | 5  | CD180         | 0 | 1.0961425 | 1.44E-08 |
| cg13277939 | 14 | CTAGE5        | 0 | 1.3446617 | 1.56E-08 |
| cg00729275 | 18 | C18orf16      | 0 | 1.9322543 | 1.57E-08 |
| cg27217148 | 10 | PCGF6         | 1 | -1.031381 | 1.70E-08 |
| cg23047271 | 3  | PRICKLE2      | 0 | 0.4828295 | 2.04E-08 |
| cg24391122 | 19 | SNAPC2        | 1 | 0.5914802 | 2.72E-08 |
| cg03112433 | 7  | PFTK1         | 0 | 0.9491788 | 3.07E-08 |
| cg01161611 | 2  | GALNT13       | 0 | 1.4967455 | 3.72E-08 |
| cg04106785 | 17 | CDK5R1        | 1 | 2.0207243 | 3.86E-08 |
| cg12428447 | 11 | SLC22A6       | 0 | 1.9190744 | 4.01E-08 |
| cg21974766 | 7  | NBLA04196     | 1 | 0.3092393 | 4.43E-08 |



|            |    |          |   |           |          |
|------------|----|----------|---|-----------|----------|
| cg08108641 | 9  | NTNG2    | 1 | 1.12111   | 5.05E-08 |
| cg08970446 | 1  | SLC1A7   | 0 | 0.9503666 | 5.13E-08 |
| cg22150335 | 10 | ANK3     | 0 | 1.8634168 | 5.32E-08 |
| cg12623088 | 15 | MGC4562  | 1 | 1.0256772 | 5.48E-08 |
| cg10148280 | 3  | HPS3     | 0 | 1.2674274 | 6.09E-08 |
| cg21457147 | 13 | KCTD4    | 0 | 1.5963143 | 6.36E-08 |
| cg25003924 | 15 | ARPP-19  | 0 | 0.6701577 | 9.67E-08 |
| cg27015931 | 16 | MGC50721 | 1 | 0.4065638 | 9.71E-08 |
| cg12611860 | 11 | PIK3C2A  | 0 | 1.2139528 | 1.04E-07 |
| cg24624841 | 19 | RPS9     | 1 | 0.5675865 | 1.11E-07 |
| cg15534366 | 20 | CDH4     | 0 | 1.4396748 | 1.14E-07 |
| cg08109646 | 1  | ZNF683   | 0 | 1.0541842 | 1.36E-07 |
| cg16986720 | 11 | DLG2     | 0 | 1.3527417 | 1.39E-07 |
| cg16215361 | 11 | MUC15    | 0 | 1.4282414 | 1.46E-07 |
| cg02332073 | 7  | TSGA13   | 0 | 1.0652523 | 1.51E-07 |
| cg01137065 | 17 | FOXK2    | 1 | 0.5638921 | 1.69E-07 |
| cg21120249 | 9  | FLJ36268 | 0 | -1.209997 | 1.74E-07 |
| cg10447080 | 6  | FILIP1   | 0 | 1.2542217 | 1.76E-07 |
| cg13802966 | 11 | CASP1    | 0 | 1.1502967 | 1.86E-07 |
| cg03431064 | 9  | TUBB2C   | 1 | 0.2418145 | 1.94E-07 |
| cg17777592 | 13 | CAB39L   | 0 | 1.3411312 | 2.26E-07 |
| cg19357849 | 19 | ELAVL1   | 1 | 0.5101581 | 2.33E-07 |
| cg04457051 | 4  | SCOC     | 0 | 1.2566917 | 2.36E-07 |
| cg22726338 | 1  | C1orf62  | 0 | 1.5868851 | 2.45E-07 |
| cg12532500 | 13 | STARD13  | 0 | 1.0280815 | 2.56E-07 |

|            |    |           |   |           |          |
|------------|----|-----------|---|-----------|----------|
| cg13415850 | 2  | C2orf7    | 0 | 0.5880546 | 2.78E-07 |
| cg21643191 | 7  | ABCB5     | 0 | 1.0268644 | 2.83E-07 |
| cg22807700 | 1  | DNTTIP2   | 1 | 1.3457144 | 3.46E-07 |
| cg00986320 | 5  | CYFIP2    | 1 | 1.8689455 | 3.60E-07 |
| cg15661409 | 14 | C14orf105 | 0 | 1.249462  | 3.88E-07 |

**Table S2B. Top One Hundred Most Significant CpG Loci Showing Changes in DNA Methylation Loci during Childhood (0–10 years).**

| CpG locus  | Chr | Gene Symbol | CPG_ISLAND<br>(1 denotes<br>in CGIs and<br>0 denotes in<br>non-CGIs) | beta<br>regression<br>coefficient | p value  |
|------------|-----|-------------|----------------------------------------------------------------------|-----------------------------------|----------|
| cg08300860 | 10  | LDB3        | 0                                                                    | -0.066                            | 2.38E-29 |
| cg27258399 | 8   | HTRA4       | 1                                                                    | 0.0507                            | 7.71E-28 |
| cg13406950 | 1   | GBP1        | 0                                                                    | -0.053                            | 4.62E-26 |
| cg14467840 | 1   | S100A1      | 0                                                                    | -0.04                             | 2.54E-24 |
| cg26218269 | 4   | MAB21L2     | 1                                                                    | 0.0497                            | 1.37E-23 |
| cg14634319 | 12  | BAZ2A       | 0                                                                    | -0.014                            | 3.25E-22 |
| cg06456031 | 7   | FLJ11000    | 0                                                                    | -0.051                            | 4.01E-22 |
| cg26790059 | 5   | MGC27121    | 0                                                                    | 0.0454                            | 4.06E-22 |
| cg02717866 | 11  | FLJ32771    | 0                                                                    | 0.038                             | 2.35E-21 |
| cg03245641 | 11  | GPHA2       | 0                                                                    | 0.0503                            | 2.88E-21 |
| cg19464252 | 16  | FBS1        | 0                                                                    | -0.046                            | 3.60E-21 |
| cg04033774 | 1   | GPSM2       | 1                                                                    | -0.059                            | 1.63E-20 |
| cg07888040 | 15  | GLDN        | 0                                                                    | -0.063                            | 1.65E-20 |
| cg25683012 | 12  | BAZ2A       | 0                                                                    | -0.016                            | 2.68E-20 |
| cg25203980 | 1   | CENTB5      | 1                                                                    | -0.055                            | 4.59E-20 |
| cg12535715 | 8   | HTRA4       | 1                                                                    | 0.055                             | 5.87E-20 |
| cg14818279 | 5   | SH3TC2      | 0                                                                    | -0.051                            | 6.32E-20 |
| cg16555388 | 3   | TNFSF10     | 0                                                                    | -0.031                            | 1.12E-19 |
| cg08290628 | 15  | CORO2B      | 0                                                                    | -0.052                            | 1.89E-19 |
| cg09432376 | 22  | APOL6       | 0                                                                    | -0.057                            | 3.86E-19 |
| cg08446111 | 16  | ABCC11      | 0                                                                    | -0.037                            | 4.23E-19 |
| cg27117399 | 18  | CNDP1       | 1                                                                    | -0.074                            | 6.03E-19 |
| cg09573795 | 4   | MSX1        | 1                                                                    | 0.0551                            | 1.09E-18 |
| cg15227610 | 11  | CRYAB       | 0                                                                    | -0.071                            | 1.47E-18 |
| cg24938727 | 3   | GUP1        | 0                                                                    | -0.04                             | 3.05E-18 |
| cg20334738 | 4   | MAB21L2     | 0                                                                    | 0.0475                            | 3.93E-18 |
| cg00237010 | 12  | NINJ2       | 0                                                                    | -0.065                            | 4.67E-18 |
| cg11719283 | 19  | ZNF574      | 0                                                                    | 0.0411                            | 4.97E-18 |
| cg13060154 | 9   | DAB2IP      | 1                                                                    | 0.0437                            | 5.88E-18 |
| cg16504798 | 19  | MYO1F       | 0                                                                    | -0.035                            | 6.70E-18 |
| cg05125838 | 3   | UCN2        | 0                                                                    | -0.058                            | 1.21E-17 |
| cg20028470 | 2   | UCN         | 1                                                                    | 0.032                             | 1.47E-17 |
| cg02228185 | 17  | ASPA        | 0                                                                    | -0.052                            | 1.49E-17 |

|            |    |           |   |        |          |
|------------|----|-----------|---|--------|----------|
| cg13576290 | 2  | LOC165186 | 0 | -0.042 | 1.94E-17 |
| cg21129531 | 7  | LRR4      | 1 | 0.0594 | 2.23E-17 |
| cg19154438 | 19 | CKM       | 0 | 0.0313 | 2.28E-17 |
| cg16463460 | 11 | WT1       | 1 | 0.0444 | 2.49E-17 |
| cg13210534 | 11 | HSPB2     | 0 | -0.032 | 2.94E-17 |
| cg16393207 | 11 | GDPD5     | 1 | 0.0549 | 3.20E-17 |
| cg27089714 | 8  | KIAA0196  | 0 | -0.039 | 3.69E-17 |
| cg19481686 | 9  | CDKN2B    | 1 | 0.0601 | 4.55E-17 |
| cg13718960 | 14 | RNASE1    | 0 | -0.07  | 7.31E-17 |
| cg14448116 | 1  | ADAMTS4   | 0 | -0.05  | 8.58E-17 |
| cg12862537 | 20 | NNAT      | 1 | 0.0387 | 1.62E-16 |
| cg12467090 | 1  | PIK3C2B   | 0 | -0.038 | 1.72E-16 |
| cg04716261 | 1  | ARPM2     | 0 | 0.0335 | 2.00E-16 |
| cg18669381 | 1  | ARHGEF19  | 0 | 0.0446 | 2.21E-16 |
| cg21402071 | 15 | CHRNA4    | 0 | 0.0339 | 2.45E-16 |
| cg18665384 | 1  | FLJ43505  | 0 | 0.0382 | 2.73E-16 |
| cg05624196 | 3  | APOD      | 1 | -0.035 | 3.28E-16 |
| cg03733371 | 3  | LIPH      | 0 | -0.04  | 3.52E-16 |
| cg16744741 | 4  | PRKG2     | 0 | -0.04  | 3.99E-16 |
| cg17034109 | 1  | CYB561D1  | 1 | 0.0317 | 4.22E-16 |
| cg05766474 | 17 | CCL16     | 0 | -0.04  | 5.91E-16 |
| cg27038439 | 4  | MSX1      | 1 | 0.0417 | 5.92E-16 |
| cg15820955 | 12 | HDAC7A    | 0 | -0.044 | 6.54E-16 |
| cg14679230 | 19 | LIPE      | 0 | -0.057 | 6.77E-16 |
| cg01656750 | 16 | KATNB1    | 0 | -0.053 | 8.78E-16 |
| cg18565510 | 1  | CENTB5    | 1 | -0.036 | 1.60E-15 |
| cg05781767 | 3  | PODXL2    | 0 | 0.0388 | 1.70E-15 |
| cg20956314 | 3  | XYLB      | 0 | 0.0149 | 1.85E-15 |
| cg18204685 | 3  | BTD       | 0 | -0.032 | 1.92E-15 |
| cg20847746 | 1  | S100A1    | 0 | -0.05  | 2.14E-15 |
| cg25799986 | 20 | WFDC2     | 1 | 0.0349 | 2.65E-15 |
| cg22449114 | 20 | TCF15     | 1 | 0.029  | 2.78E-15 |
| cg25162301 | 3  | AHSG      | 0 | -0.045 | 3.50E-15 |
| cg23902550 | 8  | TIGD5     | 1 | 0.0482 | 3.71E-15 |
| cg12008118 | 10 | LDB3      | 0 | -0.047 | 4.15E-15 |
| cg12813797 | 6  | TAAR6     | 1 | -0.045 | 5.13E-15 |
| cg20125091 | 1  | GF11      | 1 | 0.0296 | 5.73E-15 |
| cg22630748 | 12 | INHBE     | 0 | 0.0247 | 5.85E-15 |
| cg18219418 | 15 | PARP6     | 0 | -0.03  | 6.29E-15 |
| cg18555555 | 6  | FABP7     | 0 | 0.0359 | 8.72E-15 |

|            |    |          |   |        |          |
|------------|----|----------|---|--------|----------|
| cg05078019 | 4  | PDE6B    | 1 | 0.0348 | 9.03E-15 |
| cg08946332 | 17 | ALOX12   | 1 | 0.0431 | 1.16E-14 |
| cg15238200 | 17 | TRIM65   | 1 | 0.0378 | 1.36E-14 |
| cg18680834 | 19 | ZNF536   | 0 | -0.049 | 1.62E-14 |
| cg02789485 | 12 | MGC39497 | 0 | -0.045 | 1.63E-14 |
| cg12188416 | 3  | TP73L    | 0 | -0.048 | 1.65E-14 |
| cg01269795 | 6  | BTN3A3   | 0 | -0.034 | 1.83E-14 |
| cg13492227 | 17 | FGF11    | 1 | 0.0406 | 1.90E-14 |
| cg27371741 | 3  | TDGF1    | 1 | 0.043  | 2.05E-14 |
| cg05958352 | 14 | RNASE1   | 0 | -0.056 | 2.07E-14 |
| cg14959707 | 16 | ZC3H7A   | 1 | -0.038 | 2.24E-14 |
| cg04377282 | 10 | NODAL    | 1 | 0.0381 | 2.33E-14 |
| cg04527918 | 2  | UCN      | 1 | 0.0365 | 2.63E-14 |
| cg02218324 | 19 | RSHL1    | 1 | 0.0364 | 2.98E-14 |
| cg10732834 | 18 | KIAA1632 | 0 | -0.043 | 3.33E-14 |
| cg22609784 | 4  | MSX1     | 1 | 0.0349 | 3.55E-14 |
| cg12953249 | 9  | CRB2     | 1 | 0.0333 | 4.20E-14 |
| cg07180649 | 1  | WNT4     | 1 | 0.0248 | 4.30E-14 |
| cg10934032 | 14 | RNASE6   | 0 | 0.045  | 5.28E-14 |
| cg25533774 | 7  | SOSTDC1  | 0 | 0.033  | 5.88E-14 |
| cg26279025 | 19 | IL11     | 1 | 0.0209 | 8.19E-14 |
| cg19921353 | 6  | HLA-DPB1 | 0 | -0.034 | 8.26E-14 |
| cg26770882 | 17 | AIPL1    | 0 | 0.0286 | 8.28E-14 |
| cg15538820 | 9  | OBP2B    | 0 | -0.058 | 1.04E-13 |
| cg05890484 | 5  | BHMT     | 1 | 0.0417 | 1.18E-13 |
| cg02497428 | 16 | IGSF6    | 0 | -0.018 | 1.32E-13 |

**Table S2C. Top One Hundred Most Significant CpG Loci Showing Changes in DNA Methylation Loci during the Age of >10 Years**

| CpG locus  | Chr | Gene Symbol | CPG_ISLAND<br>(1 denotes<br>in CGIs and<br>0 denotes in<br>non-CGIs) | beta<br>regression<br>coefficient | p value  |
|------------|-----|-------------|----------------------------------------------------------------------|-----------------------------------|----------|
| cg22736354 | 6   | NHLRC1      | 1                                                                    | 0.00253                           | 3.15E-39 |
| cg10301967 | 6   | RPS18       | 1                                                                    | 0.001678                          | 6.10E-36 |
| cg12448933 | 17  | RAB37       | 1                                                                    | 0.001241                          | 5.19E-34 |
| cg01644850 | 19  | ZNF551      | 1                                                                    | 0.001757                          | 1.88E-32 |
| cg19996355 | 19  | PBX4        | 1                                                                    | 0.001379                          | 3.07E-31 |
| cg06156376 | 3   | SHOX2       | 1                                                                    | 0.001552                          | 6.29E-31 |
| cg15201877 | 1   | PTGER3      | 1                                                                    | 0.001358                          | 1.22E-30 |
| cg25136310 | 19  | RPL36       | 1                                                                    | 0.00197                           | 2.06E-30 |
| cg17050972 | 6   | HIST1H2AJ   | 1                                                                    | 0.001416                          | 3.40E-30 |
| cg26005082 | 19  | C19orf30    | 1                                                                    | 0.000724                          | 1.03E-29 |
| cg06458239 | 19  | ZNF549      | 1                                                                    | 0.003847                          | 1.36E-29 |
| cg21053323 | 21  | SUMO3       | 1                                                                    | 0.003246                          | 1.62E-29 |
| cg08211967 | 15  | AKAP13      | 1                                                                    | 0.000747                          | 6.79E-29 |
| cg00164898 | 22  | MAPK11      | 1                                                                    | 0.001593                          | 7.86E-29 |
| cg02512860 | 7   | CLDN15      | 0                                                                    | -0.005083                         | 1.91E-28 |
| cg08370996 | 15  | NR2F2       | 1                                                                    | 0.000971                          | 3.76E-28 |
| cg06291867 | 10  | HTR7        | 1                                                                    | 0.001446                          | 5.45E-28 |
| cg05266781 | 16  | IRX5        | 1                                                                    | 0.001373                          | 6.76E-28 |
| cg10792326 | 12  | DNCL1       | 1                                                                    | 0.002236                          | 1.43E-27 |
| cg02331561 | 16  | ABCA3       | 1                                                                    | 0.000556                          | 2.12E-27 |
| cg00548268 | 7   | NPTX2       | 1                                                                    | 0.0023                            | 2.41E-27 |
| cg06336792 | 10  | CREM        | 1                                                                    | 0.000825                          | 6.53E-27 |
| cg02409351 | 12  | CART1       | 1                                                                    | 0.000652                          | 8.81E-27 |
| cg02479575 | 19  | C19orf30    | 1                                                                    | 0.000452                          | 1.56E-25 |
| cg04084157 | 7   | VGFB        | 1                                                                    | 0.000987                          | 3.71E-25 |
| cg26780333 | 14  | ACOT4       | 1                                                                    | 0.000833                          | 8.03E-25 |
| cg14228238 | 3   | EVI1        | 1                                                                    | 0.001113                          | 8.63E-25 |
| cg06220235 | 16  | SOCS1       | 1                                                                    | 0.001226                          | 9.14E-25 |
| cg23854009 | 19  | ZNF530      | 1                                                                    | 0.000916                          | 1.03E-24 |
| cg06493386 | 8   | TRPA1       | 1                                                                    | 0.000865                          | 1.81E-24 |
| cg21589115 | 19  | DKKL1       | 1                                                                    | 0.000858                          | 2.13E-24 |
| cg22815110 | 1   | FOXD3       | 1                                                                    | 0.000844                          | 3.90E-24 |
| cg10947146 | 8   | XKR6        | 1                                                                    | 0.000654                          | 4.52E-24 |
| cg03664992 | 1   | BMP8A       | 1                                                                    | 0.001335                          | 6.09E-24 |

|            |    |          |   |           |          |
|------------|----|----------|---|-----------|----------|
| cg03160135 | 6  | VGLL2    | 1 | 0.001144  | 8.95E-24 |
| cg04033774 | 1  | GPSM2    | 1 | -0.003499 | 1.17E-23 |
| cg06490988 | 3  | GATA2    | 1 | 0.002167  | 4.63E-23 |
| cg15658426 | 5  | MGC39633 | 1 | 0.002783  | 5.05E-23 |
| cg01288598 | 6  | CD83     | 1 | 0.000817  | 1.26E-22 |
| cg23748737 | 22 | SCARF2   | 1 | 0.000494  | 1.74E-22 |
| cg01947224 | 19 | ZNF416   | 1 | 0.000504  | 3.97E-22 |
| cg03794550 | 11 | FANCF    | 1 | 0.000683  | 5.59E-22 |
| cg16652063 | 17 | SLC13A5  | 1 | 0.000677  | 6.37E-22 |
| cg13929328 | 10 | FLJ46831 | 1 | 0.000758  | 6.48E-22 |
| cg18809289 | 10 | ALOX5    | 1 | 0.0022    | 8.16E-22 |
| cg04676561 | 6  | HIST1H1B | 1 | 0.000755  | 1.66E-21 |
| cg03562120 | 20 | WISP2    | 1 | -0.004415 | 3.56E-21 |
| cg06462291 | 12 | NT5DC3   | 0 | 0.000926  | 3.86E-21 |
| cg10225525 | 14 | FUT8     | 0 | -0.002881 | 5.02E-21 |
| cg04970352 | 11 | ALX4     | 1 | 0.000923  | 5.43E-21 |
| cg22809047 | 2  | RPL31    | 1 | 0.003409  | 8.29E-21 |
| cg13744194 | 5  | OCLN     | 1 | 0.001043  | 1.40E-20 |
| cg04133652 | 17 | MLLT6    | 1 | 0.001187  | 1.66E-20 |
| cg14407667 | 1  | EPS15    | 1 | 0.00157   | 1.71E-20 |
| cg13854874 | 21 | CHAF1B   | 1 | 0.001435  | 1.76E-20 |
| cg18108623 | 17 | FLJ34922 | 1 | 0.000652  | 1.78E-20 |
| cg09298289 | 5  | CENPH    | 1 | 0.00051   | 1.84E-20 |
| cg02599464 | 6  | HIST1H4I | 1 | 0.001685  | 1.85E-20 |
| cg05421555 | 15 | AKAP13   | 1 | 0.000384  | 1.96E-20 |
| cg00453193 | 7  | TES      | 1 | 0.000513  | 2.14E-20 |
| cg25943276 | 11 | C11orf39 | 1 | -0.00333  | 2.24E-20 |
| cg04498511 | 1  | ZC3H11A  | 0 | -0.002753 | 2.27E-20 |
| cg16313343 | 14 | BRF1     | 1 | 0.002358  | 2.49E-20 |
| cg21208104 | 4  | PRSS12   | 1 | 0.000826  | 2.97E-20 |
| cg08300860 | 10 | LDB3     | 0 | -0.003167 | 4.00E-20 |
| cg08460435 | 1  | C1orf59  | 1 | 0.001239  | 4.06E-20 |
| cg00282347 | 1  | CHD5     | 1 | 0.000986  | 4.35E-20 |
| cg15599064 | 6  | HIST1H4H | 1 | 0.001356  | 5.74E-20 |
| cg12447832 | 2  | TTC15    | 1 | 0.003646  | 5.84E-20 |
| cg10608333 | 6  | HIST1H4K | 1 | 0.000741  | 7.40E-20 |
| cg03890877 | 3  | PTK9L    | 1 | 0.002116  | 9.56E-20 |
| cg23941599 | 5  | FEM1C    | 1 | 0.001951  | 9.58E-20 |
| cg18943383 | 6  | HIST1H3H | 1 | 0.001288  | 9.93E-20 |
| cg07888040 | 15 | GLDN     | 0 | -0.004078 | 1.09E-19 |
| cg00563932 | 9  | PTGDS    | 0 | -0.003533 | 1.18E-19 |
| cg03688818 | 3  | APEH     | 1 | 0.000835  | 1.21E-19 |

|            |    |          |   |           |          |
|------------|----|----------|---|-----------|----------|
| cg03975694 | 19 | ZNF540   | 1 | 0.001166  | 1.58E-19 |
| cg27529628 | 12 | GAS2L3   | 1 | 0.000768  | 1.60E-19 |
| cg21421701 | 1  | SNFT     | 1 | 0.000408  | 1.78E-19 |
| cg21269897 | 6  | HIST1H4I | 1 | 0.002093  | 1.80E-19 |
| cg24903376 | 1  | STIL     | 1 | 0.000744  | 2.38E-19 |
| cg20797766 | 16 | PRSS27   | 1 | 0.000954  | 2.63E-19 |
| cg24587268 | 20 | OSBPL2   | 1 | 0.001312  | 2.68E-19 |
| cg25186143 | 17 | FAM57A   | 1 | 0.000841  | 3.05E-19 |
| cg00059225 | 5  | GLRA1    | 1 | 0.001239  | 3.15E-19 |
| cg13749822 | 4  | HHIP     | 1 | 0.000881  | 4.07E-19 |
| cg26677448 | 10 | PAX2     | 1 | 0.000861  | 4.25E-19 |
| cg27650434 | 1  | MYCL1    | 1 | 0.000726  | 4.32E-19 |
| cg06821120 | 3  | RASSF1   | 1 | 0.002082  | 4.53E-19 |
| cg12815841 | 10 | LHPP     | 1 | 0.000786  | 5.18E-19 |
| cg20979799 | 6  | RFXDC1   | 1 | 0.000742  | 5.63E-19 |
| cg22647018 | 1  | AGT      | 0 | -0.003567 | 5.64E-19 |
| cg26149678 | 11 | IL18BP   | 0 | 0.001826  | 7.24E-19 |
| cg20692569 | 7  | FZD9     | 1 | 0.001912  | 7.42E-19 |
| cg07109287 | 9  | LHX2     | 1 | 0.000388  | 7.74E-19 |
| cg21380294 | 15 | ZSCAN2   | 1 | 0.001441  | 8.00E-19 |
| cg19224837 | 14 | GSC      | 1 | 0.000535  | 8.58E-19 |
| cg14121103 | 3  | ABHD5    | 1 | 0.000585  | 8.81E-19 |
| cg02613386 | 17 | FBXO39   | 1 | 0.000535  | 1.03E-18 |



**Table S3. Cancer-Related Genes that Showed Significant Age-Related Changes during Both Childhood and in Subjects Older than 10 Years (FDR < 0.05)**

| Gene Symbol | Location       | CpG island | beta regression coefficient for Age |                     | beta regression coefficient for Age |                      | CpG locus  |
|-------------|----------------|------------|-------------------------------------|---------------------|-------------------------------------|----------------------|------------|
|             |                |            | term (childhood)                    | p value (childhood) | term (adulthood)                    | p values (adulthood) |            |
| PRDM1       | 6q21-q22.1     | 1          | 0.0039                              | 0.000432            | 0.0007                              | 7.34E-16             | cg19464016 |
| LOX         | 5q23.2         | 1          | 0.0017                              | 0.002367            | 0.0003                              | 1.27E-13             | cg02548238 |
| MRVI1       | 11p15          | 0          | -0.0150                             | 0.000285            | -0.0024                             | 2.90E-13             | cg24541550 |
| BAP1        | 3p21.31-p21.2  | 1          | 0.0053                              | 1.56E-05            | 0.0005                              | 4.24E-13             | cg24747396 |
| PAWR        | 12q21          | 1          | 0.0026                              | 0.002869            | 0.0003                              | 2.27E-12             | cg00864867 |
| STEAP3      | 2q14.2         | 0          | 0.0173                              | 1.53E-08            | 0.0012                              | 2.91E-12             | cg06872331 |
| SMO         | 7q32.3         | 1          | 0.0113                              | 2.98E-07            | 0.0008                              | 1.01E-11             | cg04478795 |
| ERBB3       | 12q13          | 1          | -0.0118                             | 4.48E-05            | -0.0013                             | 3.01E-09             | cg19258882 |
| APC         | 5q21-q22       | 1          | 0.0034                              | 0.0004              | 0.0004                              | 3.03E-09             | cg16970232 |
| TP53        | 17p13.1        | 1          | 0.0027                              | 0.001039            | 0.0003                              | 1.23E-08             | cg11519508 |
| LCK         | 1p34.3         | 0          | -0.0385                             | 1.81E-08            | -0.0019                             | 1.70E-08             | cg01525376 |
| PDLIM4      | 5q31.1         | 1          | 0.0275                              | 3.28E-09            | 0.0012                              | 2.66E-08             | cg20512303 |
| COL4A3      | 2q36-q37       | 1          | 0.0057                              | 0.000271            | 0.0005                              | 3.02E-08             | cg16640096 |
| NBL1        | 1p36.13-p36.11 | 1          | 0.0159                              | 6.98E-05            | 0.0011                              | 5.69E-08             | cg21057046 |
| CHEK2       | 22q11 22q12.1  | 1          | 0.0061                              | 0.00901             | 0.0007                              | 8.25E-08             | cg22585269 |
| BRCA1       | 17q21          | 1          | 0.0069                              | 0.001098            | 0.0006                              | 1.71E-07             | cg08993267 |
| FABP3       | 1p33-p32       | 1          | 0.0017                              | 0.001995            | 0.0002                              | 3.69E-07             | cg03484533 |
| BAI3        | 6q12           | 0          | 0.0021                              | 0.002917            | 0.0002                              | 5.16E-07             | cg10244047 |
| PTCH        | 9q22.3         | 1          | 0.0022                              | 0.000122            | 0.0002                              | 6.68E-07             | cg21526212 |
| DAB2        | 5p13           | 0          | 0.0130                              | 0.000207            | 0.0010                              | 9.15E-07             | cg17491456 |
| LOH11CR2A   | 11q23          | 1          | -0.0094                             | 0.003816            | -0.0011                             | 1.00E-06             | cg09109996 |
| MPL         | 1p34           | 0          | -0.0072                             | 0.000799            | -0.0005                             | 6.12E-06             | cg19337279 |
| MEN1        | 11q13          | 1          | 0.0059                              | 4.25E-05            | 0.0005                              | 1.13E-05             | cg16668394 |
| CDH13       | 16q24.2-q24.3  | 1          | 0.0233                              | 2.61E-06            | 0.0012                              | 1.63E-05             | cg01880569 |
| RARB        | 3p24           | 1          | 0.0046                              | 0.001015            | 0.0004                              | 2.80E-05             | cg10712623 |
| ROS1        | 6q22           | 0          | -0.0309                             | 1.75E-10            | -0.0010                             | 3.18E-05             | cg21166999 |
| MAPK8       | 10q11.22       | 0          | -0.0284                             | 0.002386            | -0.0021                             | 3.22E-05             | cg19612574 |
| BCL10       | 1p22           | 0          | -0.0042                             | 0.000145            | -0.0003                             | 4.68E-05             | cg05475904 |
| IGSF4       | 11q23.2        | 0          | 0.0080                              | 1.77E-05            | 0.0004                              | 7.38E-05             | cg08654655 |
| CUL1        | 7q36.1         | 1          | 0.0038                              | 6.15E-05            | 0.0003                              | 8.94E-05             | cg12592716 |
| LGI1        | 10q24          | 0          | 0.0182                              | 9.51E-05            | 0.0010                              | 0.0001132            | cg00532335 |
| TFE3        | Xp11.22        | 1          | 0.0102                              | 0.003802            | 0.0010                              | 0.0001139            | cg02004156 |

|         |                |   |         |          |         |           |            |
|---------|----------------|---|---------|----------|---------|-----------|------------|
| TTC4    | 1p31.3         | 1 | 0.0084  | 0.003198 | 0.0006  | 0.0001457 | cg02255609 |
| ZNF146  | 19q13.1        | 0 | -0.0242 | 0.000105 | -0.0015 | 0.0001984 | cg02275359 |
| COL18A1 | 21q22.3        | 0 | 0.0103  | 0.000631 | 0.0007  | 0.0002088 | cg02066681 |
| MLH1    | 3p21.3         | 0 | 0.0184  | 2.63E-07 | 0.0009  | 0.0002551 | cg10990993 |
| SMARCB1 | 22q11.23 22q11 | 1 | -0.0017 | 0.003287 | -0.0001 | 0.0006012 | cg19906397 |
| FGFR3   | 4p16.3         | 1 | -0.0015 | 0.003116 | -0.0001 | 0.0007362 | cg17269277 |
| DLEC1   | 3p22-p21.3     | 1 | 0.0209  | 9.30E-05 | 0.0009  | 0.001141  | cg23881725 |
| CDKN2A  | 9p21           | 1 | 0.0090  | 6.06E-08 | 0.0003  | 0.0019241 | cg07752420 |
| NEURL   | 10q25.1        | 1 | 0.0164  | 7.25E-07 | 0.0007  | 0.0020264 | cg02324920 |
| BRCA2   | 13q12.3        | 1 | -0.0120 | 1.24E-06 | -0.0004 | 0.0022151 | cg12836863 |
| EXTL1   | 1p36.1         | 0 | 0.0118  | 0.000131 | 0.0005  | 0.0042412 | cg04629204 |
| RUNX3   | 1p36           | 1 | -0.0040 | 0.008871 | -0.0003 | 0.004737  | cg24019564 |
| CDKN2B  | 9p21           | 1 | 0.0306  | 6.69E-11 | 0.0007  | 0.0047883 | cg06421800 |
| ST13    | 22q13.2        | 1 | 0.0257  | 1.89E-07 | 0.0009  | 0.0049285 | cg18291690 |
| SLC26A3 | 7q31           | 0 | 0.0048  | 0.000105 | 0.0002  | 0.0082885 | cg22294577 |
| MYBBP1A | 17p13.3        | 1 | 0.0046  | 0.003215 | 0.0002  | 0.0091711 | cg21000021 |

**Table S4. Top One Hundred CpG loci Showing Sexually Dimorphic DNA Methylation**

| <b>CpG locus</b> | <b>Chr</b> | <b>Gene Symbol</b> | <b>CPG_ISLAND<br/>(1 denotes<br/>in CGIs and<br/>0 denotes in<br/>non-CGIs)</b> | <b>beta<br/>regression<br/>coefficient</b> | <b>p value</b> |
|------------------|------------|--------------------|---------------------------------------------------------------------------------|--------------------------------------------|----------------|
| cg04493740       | X          | SLC25A14           | 1                                                                               | -0.4054                                    | 1.61E-91       |
| cg13286902       | X          | CXorf34            | 1                                                                               | -0.4758                                    | 2.36E-91       |
| cg02148711       | X          | ATRX               | 1                                                                               | -0.4821                                    | 4.11E-91       |
| cg25591670       | X          | CXorf26            | 1                                                                               | -0.3763                                    | 2.36E-88       |
| cg00618396       | X          | VBP1               | 1                                                                               | -0.4835                                    | 2.48E-88       |
| cg20514061       | X          | MID2               | 1                                                                               | -0.5040                                    | 1.92E-87       |
| cg20816612       | X          | PHKA1              | 1                                                                               | -0.3928                                    | 3.23E-87       |
| cg10818284       | X          | SYP                | 1                                                                               | -0.5846                                    | 3.75E-87       |
| cg18799866       | X          | SLC9A7             | 1                                                                               | -0.4836                                    | 8.82E-87       |
| cg26955512       | X          | HDAC8              | 1                                                                               | -0.4138                                    | 1.47E-86       |
| cg14506668       | X          | FHL1               | 1                                                                               | -0.3255                                    | 3.45E-86       |
| cg13928116       | X          | AFF2               | 1                                                                               | -0.4161                                    | 1.83E-85       |
| cg02649608       | X          | ZBTB33             | 1                                                                               | -0.4440                                    | 3.21E-85       |
| cg23545272       | X          | EFNB1              | 1                                                                               | -0.4845                                    | 3.23E-85       |
| cg26606552       | X          | CCDC22             | 1                                                                               | -0.3466                                    | 1.05E-84       |
| cg03057808       | X          | FLJ10178           | 1                                                                               | -0.3593                                    | 1.51E-84       |
| cg01079126       | X          | MTMR1              | 1                                                                               | -0.3997                                    | 8.64E-84       |
| cg09928375       | X          | OTUD5              | 1                                                                               | -0.5256                                    | 3.01E-83       |
| cg21365235       | X          | OCRL               | 1                                                                               | -0.4789                                    | 3.95E-83       |
| cg02973971       | X          | CXorf40B           | 1                                                                               | -0.3491                                    | 4.61E-83       |
| cg11653864       | X          | ELK1               | 1                                                                               | -0.5193                                    | 7.48E-83       |
| cg12650780       | X          | SH3BGR1            | 0                                                                               | -0.3678                                    | 8.79E-83       |
| cg23947872       | X          | MTMR1              | 1                                                                               | -0.4659                                    | 3.42E-82       |
| cg21509846       | X          | BEX1               | 1                                                                               | -0.4362                                    | 3.65E-82       |
| cg12687215       | X          | FAM50A             | 1                                                                               | -0.4752                                    | 5.42E-82       |
| cg11291200       | X          | MAGEB2             | 1                                                                               | 0.3130                                     | 5.91E-82       |
| cg04238548       | X          | FLJ20298           | 1                                                                               | -0.4002                                    | 7.77E-82       |
| cg23936476       | X          | BEX1               | 1                                                                               | -0.5579                                    | 8.18E-82       |
| cg07137581       | X          | FLJ39827           | 1                                                                               | -0.2946                                    | 1.47E-81       |
| cg05254049       | X          | SYN1               | 1                                                                               | -0.4528                                    | 1.62E-81       |
| cg19949137       | X          | HTATSF1            | 1                                                                               | -0.3879                                    | 2.28E-81       |
| cg17552650       | X          | WDR45              | 1                                                                               | -0.4240                                    | 2.29E-81       |
| cg21860846       | X          | ELK1               | 1                                                                               | -0.5337                                    | 3.35E-81       |
| cg25317260       | X          | PDCD8              | 1                                                                               | -0.3440                                    | 3.70E-81       |

|            |   |           |   |         |          |
|------------|---|-----------|---|---------|----------|
| cg18923230 | X | RPL10     | 1 | -0.4987 | 4.52E-81 |
| cg21030483 | X | FAM11A    | 1 | -0.3840 | 4.59E-81 |
| cg18256128 | X | PDK3      | 1 | -0.4478 | 5.30E-81 |
|            |   | RP11-     |   |         |          |
| cg19011603 | X | 311P8.3   | 1 | -0.4027 | 7.39E-81 |
| cg19696622 | X | RPS6KA3   | 1 | -0.3392 | 9.74E-81 |
| cg21966410 | X | AR        | 1 | -0.4325 | 1.24E-80 |
| cg06162422 | X | GLA       | 1 | -0.3495 | 2.10E-80 |
| cg02804166 | X | PHF6      | 1 | -0.2692 | 2.63E-80 |
| cg24054653 | X | C1GALT1C1 | 1 | -0.3917 | 2.66E-80 |
| cg11371160 | X | UBL4A     | 1 | -0.4823 | 3.26E-80 |
| cg01080862 | X | IL13RA1   | 1 | -0.5153 | 4.21E-80 |
| cg14854487 | X | LAMP2     | 1 | -0.4401 | 4.39E-80 |
| cg17843048 | X | PHF16     | 1 | -0.4090 | 4.71E-80 |
| cg15895359 | X | EFNB1     | 1 | -0.2996 | 5.51E-80 |
| cg04872051 | X | CHST7     | 1 | -0.6251 | 5.97E-80 |
| cg16243644 | X | STAG2     | 1 | -0.3305 | 6.19E-80 |
| cg18507125 | X | RPL36A    | 1 | -0.5161 | 9.38E-80 |
| cg03936963 | X | TMEM29    | 1 | -0.4460 | 9.59E-80 |
| cg24779040 | X | TSPYL2    | 1 | -0.6085 | 1.14E-79 |
| cg12431196 | X | MAGEE1    | 1 | -0.3463 | 1.27E-79 |
| cg26738912 | X | MAGED4    | 1 | -0.3954 | 1.28E-79 |
| cg04455999 | X | FAM70A    | 1 | -0.4721 | 2.08E-79 |
|            |   | RP1-      |   |         |          |
| cg20504202 | X | 112K5.2   | 1 | -0.4732 | 6.09E-79 |
| cg05019001 | X | AR        | 1 | -0.4470 | 6.25E-79 |
| cg15231886 | X | UTP14A    | 1 | -0.4216 | 7.82E-79 |
| cg09202373 | X | DNASE1L1  | 1 | -0.4103 | 8.64E-79 |
| cg19392138 | X | ZNF449    | 1 | -0.3133 | 9.44E-79 |
| cg16343842 | X | CD99L2    | 1 | -0.3392 | 1.01E-78 |
| cg19410841 | X | NKAP      | 1 | -0.3496 | 1.18E-78 |
| cg20085077 | X | ARMCX4    | 1 | -0.4882 | 1.41E-78 |
| cg13771629 | X | EBP       | 1 | -0.3044 | 1.43E-78 |
| cg09347151 | X | MGC39606  | 1 | -0.3725 | 1.62E-78 |
| cg14642832 | X | RBMX      | 1 | -0.4065 | 1.97E-78 |
| cg18414950 | X | PDK3      | 1 | -0.4920 | 2.31E-78 |
| cg00029931 | X | RPL36A    | 1 | -0.3555 | 2.77E-78 |
| cg05782975 | X | NGFRAP1   | 1 | -0.4913 | 5.03E-78 |
| cg09229960 | X | EMD       | 1 | -0.6356 | 5.33E-78 |
| cg06277838 | X | SLC16A2   | 0 | -0.4120 | 5.65E-78 |
| cg11291009 | X | ARHGEF9   | 1 | -0.5205 | 6.07E-78 |
| cg08496601 | X | EBP       | 1 | -0.5091 | 6.21E-78 |

|            |   |          |   |         |          |
|------------|---|----------|---|---------|----------|
| cg12536534 | X | G6PD     | 1 | -0.3572 | 7.38E-78 |
| cg01718602 | X | DACH2    | 1 | -0.3764 | 7.52E-78 |
| cg18307604 | X | LAMP2    | 1 | -0.4392 | 1.00E-77 |
| cg08798116 | X | GPC4     | 1 | -0.4827 | 1.89E-77 |
| cg09018810 | X | IDS      | 1 | -0.4297 | 2.08E-77 |
| cg01241836 | X | TFE3     | 1 | -0.3645 | 2.18E-77 |
| cg18049750 | X | SCML1    | 1 | -0.3653 | 2.83E-77 |
| cg21697779 | X | FUNDC2   | 1 | -0.4024 | 3.77E-77 |
| cg02205962 | X | BCAP31   | 1 | -0.5273 | 5.12E-77 |
| cg17231524 | X | MGC39606 | 1 | -0.4559 | 5.61E-77 |
| cg18503052 | X | PLP2     | 1 | -0.3882 | 5.81E-77 |
| cg15636587 | X | GK       | 1 | -0.4069 | 6.45E-77 |
| cg14520892 | X | POLA     | 1 | -0.3947 | 6.78E-77 |
| cg19421044 | X | DNASE1L1 | 1 | -0.4118 | 7.34E-77 |
| cg14345281 | X | NHS      | 1 | -0.3969 | 1.14E-76 |
| cg15977272 | X | EFNB1    | 1 | -0.5988 | 1.21E-76 |
| cg08695223 | X | SLC9A6   | 1 | -0.5836 | 1.39E-76 |
| cg25813820 | X | MPP1     | 1 | -0.4916 | 1.39E-76 |
| cg23750556 | X | SRPX     | 1 | -0.3823 | 1.63E-76 |
| cg07473550 | X | TSC22D3  | 1 | -0.4185 | 1.79E-76 |
| cg20622056 | X | SLC7A3   | 1 | -0.2629 | 1.82E-76 |
| cg09950034 | X | BIRC4    | 1 | -0.3513 | 2.38E-76 |
| cg01353347 | X | IRAK1    | 1 | -0.5745 | 2.65E-76 |
| cg13613682 | X | ZIC3     | 1 | -0.4650 | 3.02E-76 |
| cg26810336 | X | IL1RAPL1 | 0 | -0.3392 | 3.73E-76 |

Negative beta regression coefficients indicate higher levels of methylation in females vs males.

**Table S5. Top One Hundred Negative Correlations between Gene Expression and CpG Methylation**

| Expression_Probe_ID | CpG locus  | Gene Symbol | Chr | CpGI (0-outside, 1-in) | Correlation coefficient (r) | p value  |
|---------------------|------------|-------------|-----|------------------------|-----------------------------|----------|
| 6428                | cg13759778 | OMG         | 17  | 0                      | -0.943                      | 2.76E-52 |
| 38869               | cg21588305 | NNAT        | 20  | 1                      | -0.922                      | 1.30E-45 |
| 12803               | cg02066887 | POLD4       | 11  | 0                      | -0.921                      | 3.36E-45 |
| 17240               | cg15227610 | CRYAB       | 11  | 0                      | -0.905                      | 3.89E-41 |
| 22927               | cg08477744 | MFAP2       | 1   | 0                      | -0.902                      | 2.24E-40 |
| 23208               | cg19853760 | LGALS1      | 22  | 0                      | -0.901                      | 3.78E-40 |
| 38869               | cg12862537 | NNAT        | 20  | 1                      | -0.891                      | 3.08E-38 |
| 6121                | cg19096475 | ASAM        | 11  | 1                      | -0.891                      | 4.70E-38 |
| 18618               | cg19111262 | IGSF9       | 1   | 0                      | -0.887                      | 2.24E-37 |
| 21257               | cg08191854 | TRPM2       | 21  | 0                      | -0.886                      | 3.97E-37 |
| 12868               | cg12045829 | TNFSF12     | 17  | 1                      | -0.883                      | 1.10E-36 |
| 27540               | cg21588305 | NNAT        | 20  | 1                      | -0.879                      | 8.25E-36 |
| 15244               | cg13796218 | C1orf187    | 1   | 1                      | -0.877                      | 1.43E-35 |
| 10652               | cg00476577 | ZNF217      | 20  | 0                      | -0.876                      | 2.68E-35 |
| 21420               | cg07685786 | S100B       | 21  | 0                      | -0.876                      | 2.79E-35 |
| 13585               | cg05798712 | FABP7       | 6   | 0                      | -0.875                      | 3.80E-35 |
| 17306               | cg21038229 | HMOX2       | 16  | 1                      | -0.873                      | 7.17E-35 |
| 15536               | cg19921353 | HLA-DPB1    | 6   | 0                      | -0.872                      | 1.21E-34 |
| 36867               | cg04337944 | FBLN1       | 22  | 1                      | -0.872                      | 1.31E-34 |

|       |            |          |    |   |        |          |
|-------|------------|----------|----|---|--------|----------|
| 34423 | cg20648149 | SYNE2    | 14 | 1 | -0.871 | 1.61E-34 |
| 27540 | cg12862537 | NNAT     | 20 | 1 | -0.863 | 3.16E-33 |
| 9994  | cg12144803 | KALRN    | 3  | 1 | -0.861 | 5.82E-33 |
| 17458 | cg01484156 | NCALD    | 8  | 0 | -0.860 | 8.16E-33 |
| 24882 | cg03991512 | LDHD     | 16 | 0 | -0.859 | 1.26E-32 |
| 38458 | cg20544605 | SORBS2   | 4  | 1 | -0.858 | 1.86E-32 |
| 12523 | cg00221494 | FARP1    | 13 | 1 | -0.858 | 1.89E-32 |
| 38869 | cg22298088 | NNAT     | 20 | 1 | -0.857 | 2.36E-32 |
| 31358 | cg10942056 | DISP1    | 1  | 0 | -0.856 | 4.46E-32 |
| 6390  | cg05624196 | APOD     | 3  | 1 | -0.855 | 4.96E-32 |
| 23481 | cg23801057 | P2RX7    | 12 | 0 | -0.854 | 7.42E-32 |
| 14022 | cg08880153 | MAP1A    | 15 | 0 | -0.853 | 1.10E-31 |
| 13862 | cg09158314 | TNFSF13B | 13 | 0 | -0.851 | 2.19E-31 |
| 15351 | cg13718960 | RNASE1   | 14 | 0 | -0.850 | 2.45E-31 |
| 38367 | cg20544605 | SORBS2   | 4  | 1 | -0.850 | 2.58E-31 |
| 7705  | cg27117399 | CNDP1    | 18 | 1 | -0.849 | 4.16E-31 |
| 12807 | cg25599242 | RARRES3  | 11 | 0 | -0.842 | 3.87E-30 |
| 8729  | cg15021292 | PIK3R1   | 5  | 0 | -0.840 | 6.61E-30 |
| 27540 | cg22298088 | NNAT     | 20 | 1 | -0.836 | 2.18E-29 |
| 19162 | cg03364781 | ALPK1    | 4  | 0 | -0.834 | 3.58E-29 |
| 35517 | cg05598246 | MOG      | 6  | 0 | -0.833 | 4.90E-29 |
| 8090  | cg19118077 | AKR1C3   | 10 | 0 | -0.833 | 4.96E-29 |
| 4309  | cg15021292 | PIK3R1   | 5  | 0 | -0.832 | 7.92E-29 |

|       |            |         |    |   |        |        |    |
|-------|------------|---------|----|---|--------|--------|----|
|       |            |         |    |   |        |        | 29 |
|       |            |         |    |   |        | 1.16E- | 28 |
| 7963  | cg15021292 | PIK3R1  | 5  | 0 | -0.830 |        |    |
|       |            |         |    |   |        | 1.92E- | 28 |
| 35959 | cg20648149 | SYNE2   | 14 | 1 | -0.828 |        |    |
|       |            |         |    |   |        | 2.35E- | 28 |
| 11645 | cg12360736 | MBNL1   | 3  | 0 | -0.828 |        |    |
|       |            |         |    |   |        | 2.59E- | 28 |
| 40633 | cg24127874 | HES6    | 2  | 1 | -0.827 |        |    |
|       |            |         |    |   |        | 2.74E- | 28 |
| 13714 | cg05598246 | MOG     | 6  | 0 | -0.827 |        |    |
|       |            |         |    |   |        | 3.24E- | 28 |
| 12312 | cg13210534 | HSPB2   | 11 | 0 | -0.827 |        |    |
|       |            |         |    |   |        | 3.34E- | 28 |
| 35597 | cg19007731 | RUNX1T1 | 8  | 0 | -0.826 |        |    |
|       |            |         |    |   |        | 3.91E- | 28 |
| 15991 | cg21068030 | LSMD1   | 17 | 0 | -0.826 |        |    |
|       |            |         |    |   |        | 4.80E- | 28 |
| 9994  | cg10430690 | KALRN   | 3  | 1 | -0.825 |        |    |
|       |            |         |    |   |        | 1.14E- | 27 |
| 6810  | cg22252999 | ART3    | 4  | 0 | -0.822 |        |    |
|       |            |         |    |   |        | 1.34E- | 27 |
| 19402 | cg02939139 | RASAL1  | 12 | 1 | -0.821 |        |    |
|       |            |         |    |   |        | 1.47E- | 27 |
| 28950 | cg21091679 | ELL2    | 5  | 1 | -0.821 |        |    |
|       |            |         |    |   |        | 1.95E- | 27 |
| 6910  | cg18204685 | BTD     | 3  | 0 | -0.820 |        |    |
|       |            |         |    |   |        | 2.57E- | 27 |
| 18835 | cg03633120 | NDUFA7  | 19 | 1 | -0.819 |        |    |
|       |            |         |    |   |        | 2.99E- | 27 |
| 17071 | cg00431549 | MGP     | 12 | 0 | -0.818 |        |    |
|       |            |         |    |   |        | 3.93E- | 27 |
| 38869 | cg18433380 | NNAT    | 20 | 1 | -0.817 |        |    |
|       |            |         |    |   |        | 4.05E- | 27 |
| 18987 | cg22215728 | FHIT    | 3  | 1 | -0.817 |        |    |
|       |            |         |    |   |        | 7.36E- | 27 |
| 8026  | cg11787522 | STRA6   | 15 | 0 | -0.815 |        |    |
|       |            |         |    |   |        | 1.15E- | 26 |
| 8715  | cg21588305 | NNAT    | 20 | 1 | -0.813 |        |    |
|       |            |         |    |   |        | 1.37E- | 26 |
| 10994 | cg20131968 | CCDC47  | 17 | 0 | -0.812 |        |    |
|       |            |         |    |   |        | 1.69E- | 26 |
| 19484 | cg23732024 | LY96    | 8  | 0 | -0.812 |        |    |
|       |            |         |    |   |        | 3.14E- | 26 |
| 35314 | cg19007731 | RUNX1T1 | 8  | 0 | -0.809 |        |    |



|       |            |          |    |   |        |          |
|-------|------------|----------|----|---|--------|----------|
| 34905 | cg20648149 | SYNE2    | 14 | 1 | -0.809 | 3.37E-26 |
| 9583  | cg17095731 | LRP8     | 1  | 1 | -0.809 | 3.70E-26 |
| 9971  | cg17701886 | B3GNT5   | 3  | 1 | -0.808 | 4.59E-26 |
| 2019  | cg08816023 | FGF1     | 5  | 0 | -0.807 | 5.46E-26 |
| 8715  | cg12862537 | NNAT     | 20 | 1 | -0.807 | 5.58E-26 |
| 22785 | cg13796218 | C1orf187 | 1  | 1 | -0.806 | 7.13E-26 |
| 14581 | cg17099569 | GLI2     | 2  | 0 | -0.804 | 1.08E-25 |
| 28966 | cg14467840 | S100A1   | 1  | 0 | -0.804 | 1.17E-25 |
| 26118 | cg04337944 | FBLN1    | 22 | 1 | -0.803 | 1.31E-25 |
| 27540 | cg18433380 | NNAT     | 20 | 1 | -0.803 | 1.33E-25 |
| 15351 | cg05958352 | RNASE1   | 14 | 0 | -0.803 | 1.34E-25 |
| 14555 | cg21091679 | ELL2     | 5  | 1 | -0.803 | 1.35E-25 |
| 34306 | cg20648149 | SYNE2    | 14 | 1 | -0.802 | 1.87E-25 |
| 9071  | cg07888040 | GLDN     | 15 | 0 | -0.801 | 2.33E-25 |
| 36968 | cg20648149 | SYNE2    | 14 | 1 | -0.800 | 2.64E-25 |
| 25124 | cg05949660 | MICAL1   | 6  | 1 | -0.800 | 3.29E-25 |
| 17468 | cg20011134 | DDO      | 6  | 0 | -0.799 | 3.44E-25 |
| 16780 | cg23801057 | P2RX7    | 12 | 0 | -0.797 | 5.51E-25 |
| 4978  | cg24127874 | HES6     | 2  | 1 | -0.797 | 5.58E-25 |
| 31448 | cg10942056 | DISP1    | 1  | 0 | -0.796 | 7.23E-25 |
| 6933  | cg11318251 | BAALC    | 8  | 1 | -0.796 | 7.48E-25 |
| 34422 | cg20648149 | SYNE2    | 14 | 1 | -0.796 | 8.16E-25 |
| 275   | cg10584819 | HPRT1    | 23 | 1 | -0.795 | 8.48E-25 |

|       |            |          |    |   |        |        | 25 |
|-------|------------|----------|----|---|--------|--------|----|
| 2468  | cg23352695 | EVI2A    | 17 | 0 | -0.795 | 8.63E- | 25 |
| 32811 | cg08477744 | MFAP2    | 1  | 0 | -0.794 | 1.22E- | 24 |
| 16869 | cg17701886 | B3GNT5   | 3  | 1 | -0.794 | 1.24E- | 24 |
| 17472 | cg11225410 | SOCS2    | 12 | 1 | -0.793 | 1.36E- | 24 |
| 4530  | cg10150813 | KIAA0746 | 4  | 1 | -0.792 | 2.02E- | 24 |
| 464   | cg10584819 | HPRT1    | 23 | 1 | -0.792 | 2.02E- | 24 |
| 10734 | cg07085271 | MMP24    | 20 | 0 | -0.791 | 2.16E- | 24 |
| 367   | cg10584819 | HPRT1    | 23 | 1 | -0.790 | 2.72E- | 24 |
| 224   | cg10584819 | HPRT1    | 23 | 1 | -0.790 | 2.87E- | 24 |
| 8026  | cg00075967 | STRA6    | 15 | 0 | -0.790 | 3.17E- | 24 |
| 24933 | cg00221494 | FARP1    | 13 | 1 | -0.789 | 3.76E- | 24 |
| 23081 | cg07294734 | ATP5D    | 19 | 1 | -0.788 | 4.20E- | 24 |

**Table S6. Top One Hundred Significant Cis-mQTLs**

| <b>CpG locus</b> | <b>SNP Symbol</b> | <b>CpG Gene Symbol</b> | <b>CpG Chr</b> | <b>SNP Gene Symbol</b> | <b>SNP Chr</b> | <b>P value (-log)</b> |
|------------------|-------------------|------------------------|----------------|------------------------|----------------|-----------------------|
| cg17749961       | rs1662955         | LYCAT                  | 2              | LYCAT                  | 2              | 39.91                 |
| cg17749961       | rs1723167         | LYCAT                  | 2              | LYCAT                  | 2              | 36.36                 |
| cg19766460       | rs1571737         | C21orf128              | 21             | UMODL1                 | 21             | 36.11                 |
| cg17749961       | rs1612616         | LYCAT                  | 2              | LYCAT                  | 2              | 35.83                 |
| cg01889448       | rs1063355         | HLA-DQB1               | 6              | HLA-DQB1               | 6              | 29.41                 |
| cg12339802       | rs11264091        | C1orf109               | 1              | EPHA10                 | 1              | 28.71                 |
| cg06665322       | rs2281962         | GPA33                  | 1              | GPA33                  | 1              | 28.30                 |
| cg14129786       | rs7076950         | MGMT                   | 10             | MGMT                   | 10             | 27.05                 |
| cg06509940       | rs4330287         | CD80                   | 3              | ADPRH                  | 3              | 26.89                 |
| cg08679985       | rs663818          | KLF17                  | 1              | KLF17                  | 1              | 26.78                 |
| cg26063872       | rs17090740        | DEFB123                | 20             | DEFB121                | 20             | 25.87                 |
| cg26981881       | rs10982549        |                        | 9              | TNC                    | 9              | 25.18                 |
| cg08679985       | rs1291051         | KLF17                  | 1              | LOC644743              | 1              | 25.00                 |
| cg08679985       | rs600450          | KLF17                  | 1              | KLF17                  | 1              | 24.42                 |
| cg25427638       | rs10409701        | CYP2A7                 | 19             | CYP2B6                 | 19             | 23.65                 |
| cg14893161       | rs708727          | FLJ32569               | 1              | SLC41A1                | 1              | 23.30                 |
| cg14159672       | rs708727          | FLJ32569               | 1              | SLC41A1                | 1              | 23.27                 |
| cg14141399       | rs11672222        | HAS1                   | 19             | HAS1                   | 19             | 23.24                 |
| cg05213296       | rs3862838         | BXDC1                  | 6              | BXDC1                  | 6              | 22.91                 |
| cg05213296       | rs9400437         | BXDC1                  | 6              | GTF3C6                 | 6              | 22.91                 |
| cg08424423       | rs3095320         | CDSN                   | 6              | CDSN                   | 6              | 21.94                 |
| cg15028436       | rs1470719         | TXNDC3                 | 7              | TXNDC3                 | 7              | 21.45                 |
| cg11003133       | rs1935067         | AIM2                   | 1              | AIM2                   | 1              | 21.32                 |
| cg14162076       | rs7298236         | CLEC4D                 | 12             | CLEC4D                 | 12             | 21.17                 |
| cg22680812       | rs16957292        | EPB42                  | 15             | UBR1                   | 15             | 20.98                 |
| cg25040282       | rs1220841         | HTN3                   | 4              | CSN1S1                 | 4              | 20.91                 |
| cg16354207       | rs10167355        | UBE2F                  | 2              | UBE2F                  | 2              | 20.38                 |
| cg13782134       | rs7196925         | UNQ2446                | 16             | PSKH1                  | 16             | 20.35                 |
| cg00849368       | rs17084916        | ARSK                   | 5              | ARSK                   | 5              | 20.34                 |
| cg00799727       | rs916016          | MAGEA11                | 23             | MAGEA11                | 23             | 20.18                 |
| cg13131015       | rs2099015         | GUCY2C                 | 12             | GUCY2C                 | 12             | 20.14                 |
| cg20022541       | rs971618          | C14orf152              | 14             | C14orf152              | 14             | 20.05                 |
| cg20389709       | rs7632            | KLF11                  | 2              | KLF11                  | 2              | 20.03                 |
| cg13284426       | rs7731035         | RAB24                  | 5              | NSD1                   | 5              | 19.74                 |
| cg06210526       | rs12460494        | CYP2F1                 | 19             | CYP2A13                | 19             | 19.60                 |
| cg05163071       | rs11708527        | RETNLB                 | 3              | RETNLB                 | 3              | 19.59                 |
| cg22373097       | rs2833073         | KRTAP21-1              | 21             | KRTAP21-2              | 21             | 19.52                 |

|            |            |          |    |           |    |       |
|------------|------------|----------|----|-----------|----|-------|
| cg07175007 | rs2050907  | UHMK1    | 1  | UHMK1     | 1  | 19.45 |
| cg07175007 | rs4657201  | UHMK1    | 1  | UHMK1     | 1  | 19.45 |
| cg25677688 | rs2010481  | TAS2R48  | 12 | TAS2R44   | 12 | 19.43 |
| cg25677688 | rs10772420 | TAS2R48  | 12 | TAS2R48   | 12 | 19.43 |
| cg25677688 | rs1376250  | TAS2R48  | 12 | TAS2R48   | 12 | 19.43 |
| cg25677688 | rs4763602  | TAS2R48  | 12 | TAS2R50   | 12 | 19.43 |
| cg25677688 | rs2708389  | TAS2R48  | 12 | TAS2R46   | 12 | 19.33 |
| cg07175007 | rs6427680  | UHMK1    | 1  | UHMK1     | 1  | 19.31 |
| cg23183296 | rs2088092  | UGT2B28  | 4  | UGT2B4    | 4  | 19.29 |
| cg23183296 | rs2101793  | UGT2B28  | 4  | UGT2B4    | 4  | 19.29 |
| cg14129786 | rs7080548  | MGMT     | 10 | MGMT      | 10 | 19.08 |
| cg19109431 | rs2233434  | NFKBIE   | 6  | NFKBIE    | 6  | 19.05 |
| cg25677688 | rs2900554  | TAS2R48  | 12 | TAS2R50   | 12 | 19.00 |
| cg06617418 | rs7887044  | RGAG1    | 23 | RGAG1     | 23 | 18.94 |
| cg08424423 | rs3094211  | CDSN     | 6  | CDSN      | 6  | 18.84 |
| cg17571291 | rs10215155 | BLVRA    | 7  | BLVRA     | 7  | 18.81 |
| cg17385448 | rs11580170 | AGMAT    | 1  | AGMAT     | 1  | 18.72 |
| cg00849368 | rs3909479  | ARSK     | 5  | FAM81B    | 5  | 18.65 |
| cg07175007 | rs10919550 | UHMK1    | 1  | UHMK1     | 1  | 18.64 |
| cg14129786 | rs11016838 | MGMT     | 10 | MGMT      | 10 | 18.48 |
| cg06509940 | rs12496520 | CD80     | 3  | ADPRH     | 3  | 18.47 |
| cg06509940 | rs12487334 | CD80     | 3  | ADPRH     | 3  | 18.47 |
| cg06509940 | rs6438537  | CD80     | 3  | CD80      | 3  | 18.26 |
| cg12308275 | rs471122   | TGM5     | 15 | TGM5      | 15 | 18.22 |
| cg13877915 | rs1465789  | ZNF132   | 19 | ZNF132    | 19 | 18.04 |
| cg25677688 | rs7486717  | TAS2R48  | 12 | TAS2R42   | 12 | 17.94 |
| cg25677688 | rs2600359  | TAS2R48  | 12 | NULL      | 12 | 17.94 |
| cg22680812 | rs9972367  | EPB42    | 15 | TUBGCP4   | 15 | 17.93 |
| cg19234089 | rs7926657  | SART1    | 11 | TSGA10IP  | 11 | 17.90 |
| cg12454167 | rs3821815  | KNG1     | 3  | KNG1      | 3  | 17.80 |
| cg23183296 | rs12501393 | UGT2B28  | 4  | LOC642496 | 4  | 17.77 |
| cg10735607 | rs7107068  | TMEM109  | 11 | PRPF19    | 11 | 17.65 |
| cg17267907 | rs10503362 | DEFA1    | 8  | DEFA1     | 8  | 17.62 |
| cg09553448 | rs3736957  | NUP214   | 9  | NUP214    | 9  | 17.62 |
| cg14332079 | rs9644041  | CDCA2    | 8  | CDCA2     | 8  | 17.56 |
| cg23183296 | rs12506196 | UGT2B28  | 4  | LOC642496 | 4  | 17.46 |
| cg07175007 | rs6665354  | UHMK1    | 1  | UHMK1     | 1  | 17.34 |
| cg23855989 | rs3759129  | AQP5     | 12 | AQP5      | 12 | 17.32 |
| cg00750606 | rs1890005  | CDA      | 1  | CDA       | 1  | 17.32 |
| cg25427638 | rs3745275  | CYP2A7   | 19 | CYP2B6    | 19 | 17.25 |
| cg10281770 | rs4789817  | WDR45L   | 17 | WDR45L    | 17 | 17.20 |
| cg20203395 | rs2441132  | MGC33648 | 5  | MIER3     | 5  | 17.20 |

|            |            |           |    |           |    |       |
|------------|------------|-----------|----|-----------|----|-------|
| cg14751914 | rs2337146  | SMAD7     | 18 | SMAD7     | 18 | 17.19 |
| cg14633704 | rs4743713  | HSD17B3   | 9  | HSD17B3   | 9  | 17.18 |
| cg10237469 | rs10402677 | CEACAM4   | 19 | CEACAM1   | 19 | 17.17 |
| cg14893161 | rs708724   | FLJ32569  | 1  | RAB7L1    | 1  | 17.13 |
| cg24920358 | rs7547787  | PPIE      | 1  | PPIE      | 1  | 16.92 |
| cg14633704 | rs9299367  | HSD17B3   | 9  | HSD17B3   | 9  | 16.90 |
| cg10115873 | rs5758108  | DNAJB7    | 22 | ST13      | 22 | 16.81 |
| cg10237469 | rs11666835 | CEACAM4   | 19 | CEACAM1   | 19 | 16.75 |
| cg25427638 | rs3745277  | CYP2A7    | 19 | CYP2B6    | 19 | 16.67 |
| cg05467918 | rs4949874  | ACADM     | 1  | LOC646425 | 1  | 16.62 |
| cg08634464 | rs8100809  | LOC126295 | 19 | ZNF57     | 19 | 16.56 |
| cg14893161 | rs823130   | FLJ32569  | 1  | NUCKS1    | 1  | 16.36 |
| cg10001720 | rs3762296  | LAPTM5    | 1  | LAPTM5    | 1  | 16.36 |
| cg21298523 | rs7673763  | NUDT9     | 4  | NUDT9     | 4  | 16.35 |
| cg10237469 | rs16975865 | CEACAM4   | 19 | CEACAM1   | 19 | 16.34 |
| cg10237469 | rs1859341  | CEACAM4   | 19 | CEACAM8   | 19 | 16.28 |
| cg25172835 | rs7182756  | PUNC      | 15 | PUNC      | 15 | 16.26 |
| cg21717724 | rs10760117 | PSMD5     | 9  | PSMD5     | 9  | 16.23 |
| cg24150528 | rs12110174 | FLJ10246  | 5  | ZNF131    | 5  | 16.22 |
| cg02579736 | rs7615646  | FANCD2    | 3  | FANCD2    | 3  | 16.22 |

**Table S7. Top One Hundred Significant Trans-mQTLs**

| CpG locus  | SNP Symbol | CpG Gene Symbol | CpG Chr | SNP Gene Symbol | SNP Chr | P value (-log) |
|------------|------------|-----------------|---------|-----------------|---------|----------------|
| cg18984499 | rs11847580 | RPL26           | 17      | C14orf72        | 14      | 24.16          |
| cg17704839 | rs733675   | UBL5            | 19      | RHOT1           | 17      | 23.55          |
| cg18634211 | rs2288322  | LIN28           | 1       | FKBP7           | 2       | 21.51          |
| cg18634211 | rs10207436 | LIN28           | 1       | PRKRA           | 2       | 21.38          |
| cg25299176 | rs4281963  | YWHAE           | 17      | LOC647002       | 2       | 19.66          |
| cg03923277 | rs326387   | TDG             | 12      | TMEM132B        | 12      | 19.52          |
| cg25299176 | rs6716175  | YWHAE           | 17      | LOC440917       | 2       | 18.85          |
| cg18984499 | rs4906142  | RPL26           | 17      | PPP2R5C         | 14      | 18.48          |
| cg13514129 | rs12130070 | MACF1           | 1       | SMYD3           | 1       | 18.38          |
| cg13514129 | rs2878079  | MACF1           | 1       | SMYD3           | 1       | 18.38          |
| cg13514129 | rs1361409  | MACF1           | 1       | SMYD3           | 1       | 18.38          |
| cg13514129 | rs1770011  | MACF1           | 1       | SMYD3           | 1       | 18.38          |
| cg10052190 | rs2891924  | C16orf52        | 16      | LOC389199       | 4       | 18.32          |
| cg18540325 | rs2855983  | PRSS3           | 9       | PRSS2           | 7       | 17.53          |
| cg18634211 | rs3752689  | LIN28           | 1       | PRKRA           | 2       | 17.15          |
| cg13055278 | rs1508399  | ID2             | 2       | ID2B            | 3       | 16.73          |
| cg27059238 | rs162344   | HIST1H2BI       | 6       | HSF2BP          | 21      | 14.91          |
| cg18634211 | rs4894020  | LIN28           | 1       | PRKRA           | 2       | 14.80          |
| cg13055278 | rs886556   | ID2             | 2       | PTPRG           | 3       | 14.19          |
| cg05294455 | rs16833894 | MYL4            | 17      | RGS18           | 1       | 13.94          |
| cg27059238 | rs8131020  | HIST1H2BI       | 6       | H2BFS           | 21      | 13.72          |
| cg02367951 | rs8131020  | HIST1H2AK       | 6       | H2BFS           | 21      | 13.58          |
| cg02367951 | rs162344   | HIST1H2AK       | 6       | HSF2BP          | 21      | 13.49          |
| cg13514129 | rs2878076  | MACF1           | 1       | SMYD3           | 1       | 13.33          |
| cg13514129 | rs4654096  | MACF1           | 1       | SMYD3           | 1       | 13.07          |
| cg13514129 | rs10924574 | MACF1           | 1       | SMYD3           | 1       | 13.07          |
| cg25136926 | rs10843881 | DDX12           | 12      | DDX11           | 12      | 12.97          |
| cg04482110 | rs17110725 | TMEM106A        | 17      | NOVA1           | 14      | 12.87          |
| cg13735697 | rs11958487 | MYOG            | 1       | H2AFY           | 5       | 12.82          |
| cg27050763 | rs3849350  | AHCTF1          | 1       | TBR1            | 2       | 12.77          |
| cg23698956 | rs2423515  | FAM3A           | 23      | JAG1            | 20      | 12.76          |
| cg16791686 | rs17635194 | GLTSCR2         | 19      | LOC440311       | 15      | 12.60          |
| cg18121684 | rs17073456 | SERPINB13       | 18      | KIAA0774        | 13      | 12.34          |
| cg05294455 | rs11963169 | MYL4            | 17      | LOC643623       | 6       | 12.32          |
| cg25136926 | rs4031375  | DDX12           | 12      | DDX11           | 12      | 12.27          |
| cg10066332 | rs1733161  | PPP1R13B        | 14      | PTPRN2          | 7       | 12.10          |
| cg08081407 | rs16853445 | ARF4            | 3       | LIMCH1          | 4       | 12.01          |
| cg24457403 | rs13405816 | KRT16           | 17      | ZNF385B         | 2       | 11.98          |

|            |            |           |    |                  |    |       |
|------------|------------|-----------|----|------------------|----|-------|
| cg20530056 | rs16968827 | IKBKE     | 1  | HMG20A           | 15 | 11.96 |
| cg16639637 | rs1541352  | TUBGCP5   | 15 | HS3ST3A1         | 17 | 11.92 |
| cg11159299 | rs7247364  | GZMM      | 19 | ATP8B3           | 19 | 11.84 |
| cg13043862 | rs16878308 | EYA1      | 8  | RBPJ             | 4  | 11.83 |
| cg07296772 | rs12361631 | CHMP4A    | 14 | C11orf39         | 11 | 11.72 |
| cg05294455 | rs4924379  | MYL4      | 17 | FSIP1            | 15 | 11.66 |
| cg05294455 | rs16952186 | MYL4      | 17 | FSIP1            | 15 | 11.66 |
| cg12623088 | rs12062445 | MGC4562   | 15 | PLD5             | 1  | 11.64 |
| cg26970800 | rs10053496 | GIF       | 11 | WWC1             | 5  | 11.58 |
| cg05749792 | rs9504822  | DGAT2L6   | 23 | RP3-<br>398D13.1 | 6  | 11.55 |
| cg10237469 | rs10424276 | CEACAM4   | 19 | CEACAM8          | 19 | 11.54 |
| cg10237469 | rs10413014 | CEACAM4   | 19 | CEACAM8          | 19 | 11.54 |
| cg25007250 | rs10803607 | NOS3      | 7  | LOC729958        | 2  | 11.43 |
| cg13547237 | rs9593567  | Bles03    | 11 | LOC647313        | 13 | 11.41 |
| cg18806365 | rs2062235  | FABP5     | 8  | AKAP13           | 15 | 11.38 |
| cg02921257 | rs226591   | CMYA1     | 3  | ACTRT1           | 23 | 11.38 |
| cg05294455 | rs7557971  | MYL4      | 17 | COL4A4           | 2  | 11.38 |
| cg04756629 | rs2910948  | LOC400696 | 19 | DAB2             | 5  | 11.38 |
| cg26594488 | rs5999501  | LOC54103  | 7  | LOC646677        | 22 | 11.35 |
| cg13514129 | rs12033048 | MACF1     | 1  | SMYD3            | 1  | 11.26 |
| cg01144251 | rs11106707 | KLK9      | 19 | NAV3             | 12 | 11.24 |
| cg03000846 | rs9681990  | RAC3      | 17 | FLNB             | 3  | 11.23 |
| cg26155617 | rs12261706 | DDO       | 6  | ADARB2           | 10 | 11.22 |
| cg24784109 | rs8131020  | HIST1H3D  | 6  | H2BFS            | 21 | 11.21 |
| cg22909609 | rs10509870 | ITGBL1    | 13 | SORCS1           | 10 | 11.14 |
| cg07806164 | rs8124998  | UBE2E2    | 3  | APCDD1L          | 20 | 11.07 |
| cg23698956 | rs12361631 | FAM3A     | 23 | C11orf39         | 11 | 11.03 |
| cg09988116 | rs11190327 | MGC52423  | 1  | DNMBP            | 10 | 11.01 |
| cg07755653 | rs3093032  | STX11     | 6  | ICAM1            | 19 | 11.00 |
| cg07440877 | rs16875123 | FLJ46358  | 13 | ADAMTS16         | 5  | 10.96 |
| cg10115873 | rs16978267 | DNAJB7    | 22 | SETBP1           | 18 | 10.96 |
| cg25299176 | rs4328686  | YWHAE     | 17 | LOC647002        | 2  | 10.95 |
| cg00592315 | rs17060350 | C14orf152 | 14 | FBXO8            | 4  | 10.95 |
| cg24789869 | rs6487735  | DDX11     | 12 | LOC642846        | 12 | 10.93 |
| cg03065661 | rs234798   | CRSP6     | 11 | PSAT1            | 9  | 10.91 |
| cg01228667 | rs2304955  | GPR101    | 23 | GOLGA1           | 9  | 10.91 |
| cg00974864 | rs4673130  | FCGR3B    | 1  | DOCK10           | 2  | 10.88 |
| cg20530056 | rs904874   | IKBKE     | 1  | ARHGEF3          | 3  | 10.88 |
| cg27050763 | rs768835   | AHCTF1    | 1  | TBR1             | 2  | 10.88 |
| cg18806365 | rs1828482  | FABP5     | 8  | LOC642935        | 15 | 10.86 |
| cg26907889 | rs10509870 | NONO      | 23 | SORCS1           | 10 | 10.79 |

|            |            |          |    |           |    |       |
|------------|------------|----------|----|-----------|----|-------|
| cg21824213 | rs6935954  | CASC5    | 15 | HIST1H2BH | 6  | 10.77 |
| cg23940655 | rs11748623 | C14orf43 | 14 | FLJ43080  | 5  | 10.76 |
| cg13547237 | rs13395406 | Bles03   | 11 | LOC284998 | 2  | 10.74 |
| cg27303882 | rs1003301  | PAGE2    | 23 | NULL      | 12 | 10.72 |
| cg21353232 | rs12456242 | SEZ6L    | 22 | LOC728864 | 18 | 10.71 |
| cg23698956 | rs6087073  | FAM3A    | 23 | PSMF1     | 20 | 10.70 |
| cg20833786 | rs17035639 | MRGPRX3  | 11 | SLC5A7    | 2  | 10.70 |
| cg24457403 | rs13360221 | KRT16    | 17 | MGC23985  | 5  | 10.68 |
| cg03704031 | rs11569726 | INGX     | 23 | SULT1B1   | 4  | 10.68 |
| cg00658007 | rs11000153 | C1orf36  | 1  | SPOCK2    | 10 | 10.67 |
| cg14850026 | rs11728293 | ECAT11   | 1  | CENTD1    | 4  | 10.67 |
| cg13806135 | rs6826708  | PCDH17   | 13 | GABRB1    | 4  | 10.65 |
| cg26594488 | rs16944749 | LOC54103 | 7  | LOC390419 | 13 | 10.65 |
| cg05294455 | rs6882215  | MYL4     | 17 | RAB3C     | 5  | 10.64 |
| cg05294455 | rs17077508 | MYL4     | 17 | TMEM158   | 3  | 10.61 |
| cg15521097 | rs10509870 | ITIH5L   | 23 | SORCS1    | 10 | 10.57 |
| cg21824213 | rs9393692  | CASC5    | 15 | HIST1H2BI | 6  | 10.56 |
| cg25942450 | rs12694755 | TLX3     | 5  | LOC729968 | 2  | 10.55 |
| cg26390526 | rs13029721 | FLG      | 1  | PMS1      | 2  | 10.53 |
| cg02275359 | rs4771834  | ZNF146   | 19 | GPC5      | 13 | 10.52 |



**Table S9A. Top One Hundred mQTLs in African American Subjects**

| CpG locus  | CpG Gene Symbol | CpG Chr | SNP Symbol | SNP Gene Symbol | SNP Chr | P value (-log) |
|------------|-----------------|---------|------------|-----------------|---------|----------------|
| cg17749961 | LYCAT           | 2       | rs1662955  | LYCAT           | 2       | 28.70          |
| cg14129786 | MGMT            | 10      | rs7076950  | MGMT            | 10      | 26.98          |
| cg17749961 | LYCAT           | 2       | rs1612616  | LYCAT           | 2       | 26.48          |
| cg17749961 | LYCAT           | 2       | rs1723167  | LYCAT           | 2       | 24.19          |
| cg05213296 | BXDC1           | 6       | rs3862838  | BXDC1           | 6       | 21.85          |
| cg05213296 | BXDC1           | 6       | rs9400437  | GTF3C6          | 6       | 21.85          |
| cg22373097 | KRTAP21-1       | 21      | rs2833073  | KRTAP21-2       | 21      | 21.48          |
| cg14159672 | FLJ32569        | 1       | rs708727   | SLC41A1         | 1       | 20.21          |
| cg06617418 | RGAG1           | 23      | rs7887044  | RGAG1           | 23      | 19.63          |
| cg06665322 | GPA33           | 1       | rs2281962  | GPA33           | 1       | 18.80          |
| cg01889448 | HLA-DQB1        | 6       | rs1063355  | HLA-DQB1        | 6       | 18.65          |
| cg12339802 | C1orf109        | 1       | rs11264091 | EPHA10          | 1       | 17.82          |
| cg13131015 | GUCY2C          | 12      | rs2099015  | GUCY2C          | 12      | 17.53          |
| cg06509940 | CD80            | 3       | rs4330287  | ADPRH           | 3       | 17.50          |
| cg08679985 | KLF17           | 1       | rs663818   | KLF17           | 1       | 16.87          |
| cg00849368 | ARSK            | 5       | rs17084916 | ARSK            | 5       | 16.66          |
| cg13284426 | RAB24           | 5       | rs7731035  | NSD1            | 5       | 16.46          |
| cg14159672 | FLJ32569        | 1       | rs1172198  | SLC45A3         | 1       | 16.43          |
| cg14159672 | FLJ32569        | 1       | rs823105   | SLC45A3         | 1       | 16.43          |
| cg14751914 | SMAD7           | 18      | rs2337146  | SMAD7           | 18      | 16.36          |
| cg21717724 | PSMD5           | 9       | rs4837796  | PSMD5           | 9       | 16.35          |
| cg21717724 | PSMD5           | 9       | rs10760117 | PSMD5           | 9       | 16.35          |
| cg19584733 | DENND4C         | 9       | rs7851902  | DENND4C         | 9       | 16.13          |
| cg27398547 | C14orf39        | 14      | rs1955700  | SIX1            | 14      | 16.09          |
| cg09419670 | PSMD5           | 9       | rs4837796  | PSMD5           | 9       | 15.90          |
| cg09419670 | PSMD5           | 9       | rs10760117 | PSMD5           | 9       | 15.90          |
| cg08679985 | KLF17           | 1       | rs1291051  | LOC644743       | 1       | 15.74          |
| cg01119135 | C1orf116        | 1       | rs2629676  | C1orf116        | 1       | 15.62          |
| cg00849368 | ARSK            | 5       | rs3909479  | FAM81B          | 5       | 15.50          |
| cg27398547 | C14orf39        | 14      | rs12436632 | SIX6            | 14      | 15.36          |
| cg12308275 | TGM5            | 15      | rs471122   | TGM5            | 15      | 15.17          |
| cg22680812 | EPB42           | 15      | rs9972367  | TUBGCP4         | 15      | 15.14          |
| cg27398547 | C14orf39        | 14      | rs2224410  | SIX6            | 14      | 15.05          |
| cg13798376 | DSPG3           | 12      | rs10859103 | KERA            | 12      | 14.71          |
| cg13798376 | DSPG3           | 12      | rs2735333  | KERA            | 12      | 14.71          |
| cg14893161 | FLJ32569        | 1       | rs708727   | SLC41A1         | 1       | 14.71          |
| cg17385448 | AGMAT           | 1       | rs11580170 | AGMAT           | 1       | 14.01          |
| cg08679985 | KLF17           | 1       | rs600450   | KLF17           | 1       | 13.98          |

|            |           |    |            |           |    |       |
|------------|-----------|----|------------|-----------|----|-------|
| cg12454167 | KNG1      | 3  | rs1621816  | KNG1      | 3  | 13.94 |
| cg14129786 | MGMT      | 10 | rs11016838 | MGMT      | 10 | 13.84 |
| cg08424423 | CDSN      | 6  | rs3094211  | CDSN      | 6  | 13.73 |
| cg08424423 | CDSN      | 6  | rs3095320  | CDSN      | 6  | 13.71 |
| cg25427638 | CYP2A7    | 19 | rs10409701 | CYP2B6    | 19 | 13.61 |
| cg10237469 | CEACAM4   | 19 | rs10402677 | CEACAM1   | 19 | 13.60 |
| cg27398547 | C14orf39  | 14 | rs10873125 | SIX6      | 14 | 13.59 |
| cg10237469 | CEACAM4   | 19 | rs1859341  | CEACAM8   | 19 | 13.59 |
| cg04001333 | C14orf58  | 14 | rs2287015  | FLVCR2    | 14 | 13.56 |
| cg04001333 | C14orf58  | 14 | rs4903329  | FLVCR2    | 14 | 13.56 |
| cg12454167 | KNG1      | 3  | rs3821815  | KNG1      | 3  | 13.46 |
| cg27398547 | C14orf39  | 14 | rs1268621  | C14orf39  | 14 | 13.44 |
| cg14074641 | ABCC12    | 16 | rs16945883 | ABCC12    | 16 | 13.40 |
| cg02254407 | PLEKHB1   | 11 | rs652229   | PLEKHB1   | 11 | 13.32 |
| cg15028436 | TXNDC3    | 7  | rs1470719  | TXNDC3    | 7  | 13.29 |
| cg23183296 | UGT2B28   | 4  | rs2088092  | UGT2B4    | 4  | 13.29 |
| cg23183296 | UGT2B28   | 4  | rs2101793  | UGT2B4    | 4  | 13.29 |
| cg23183296 | UGT2B28   | 4  | rs12501393 | LOC642496 | 4  | 13.22 |
| cg13798376 | DSPG3     | 12 | rs4842515  | KERA      | 12 | 13.22 |
| cg13877915 | ZNF132    | 19 | rs1465789  | ZNF132    | 19 | 13.17 |
| cg10237469 | CEACAM4   | 19 | rs11666835 | CEACAM1   | 19 | 13.16 |
| cg08634464 | LOC126295 | 19 | rs8100809  | ZNF57     | 19 | 13.09 |
| cg23183296 | UGT2B28   | 4  | rs12506196 | LOC642496 | 4  | 12.98 |
| cg20051177 | TCF20     | 22 | rs5996130  | TCF20     | 22 | 12.95 |
| cg05163071 | RETNLB    | 3  | rs11708527 | RETNLB    | 3  | 12.76 |
| cg13410437 | OR5P2     | 11 | rs11500784 | OR5P3     | 11 | 12.75 |
| cg14386312 | ZNF544    | 19 | rs260428   | ZNF544    | 19 | 12.74 |
| cg13798376 | DSPG3     | 12 | rs734722   | KERA      | 12 | 12.73 |
| cg18081313 | ULK1      | 12 | rs11246867 | ULK1      | 12 | 12.68 |
| cg00406188 | LCE2C     | 1  | rs12096806 | LCE2C     | 1  | 12.64 |
| cg14141399 | HAS1      | 19 | rs11672222 | HAS1      | 19 | 12.61 |
| cg10708675 | NQO1      | 16 | rs8047010  | WWP2      | 16 | 12.53 |
| cg02579736 | FANCD2    | 3  | rs7615646  | FANCD2    | 3  | 12.53 |
| cg10708675 | NQO1      | 16 | rs11861500 | NFAT5     | 16 | 12.53 |
| cg10237469 | CEACAM4   | 19 | rs16975865 | CEACAM1   | 19 | 12.52 |
| cg24655310 | CYP4F11   | 19 | rs3810427  | CYP4F11   | 19 | 12.45 |
| cg02254407 | PLEKHB1   | 11 | rs1723846  | MRPL48    | 11 | 12.30 |
| cg02254407 | PLEKHB1   | 11 | rs1723849  | RAB6A     | 11 | 12.30 |
| cg02254407 | PLEKHB1   | 11 | rs4944859  | RAB6A     | 11 | 12.30 |
| cg02254407 | PLEKHB1   | 11 | rs2515095  | PAAF1     | 11 | 12.27 |
| cg02254407 | PLEKHB1   | 11 | rs1670561  | PAAF1     | 11 | 12.27 |
| cg02254407 | PLEKHB1   | 11 | rs2511262  | MRPL48    | 11 | 12.27 |

|            |          |    |            |           |    |       |
|------------|----------|----|------------|-----------|----|-------|
| cg22825487 | VNN3     | 6  | rs6942306  | VNN3      | 6  | 12.25 |
| cg05213296 | BXDC1    | 6  | rs3763195  | BXDC1     | 6  | 11.92 |
| cg05149586 | SDSL     | 12 | rs12823432 | SDSL      | 12 | 11.90 |
| cg14332079 | CDCA2    | 8  | rs9644041  | CDCA2     | 8  | 11.89 |
| cg00799727 | MAGEA11  | 23 | rs916016   | MAGEA11   | 23 | 11.85 |
| cg27398547 | C14orf39 | 14 | rs1010053  | SIX6      | 14 | 11.85 |
| cg13055001 | PPP1CA   | 11 | rs3781941  | CLCF1     | 11 | 11.74 |
| cg13055001 | PPP1CA   | 11 | rs1790740  | CLCF1     | 11 | 11.74 |
| cg13055001 | PPP1CA   | 11 | rs1638567  | POLD4     | 11 | 11.74 |
| cg02579736 | FANCD2   | 3  | rs3732966  | TMEM111   | 3  | 11.67 |
| cg10001720 | LAPTM5   | 1  | rs3762296  | LAPTM5    | 1  | 11.65 |
| cg05213296 | BXDC1    | 6  | rs1704721  | LOC442244 | 6  | 11.59 |
| cg23183296 | UGT2B28  | 4  | rs12513058 | LOC642496 | 4  | 11.58 |
| cg07175007 | UHMK1    | 1  | rs10919550 | UHMK1     | 1  | 11.58 |
| cg20203395 | MGC33648 | 5  | rs2662027  | MIER3     | 5  | 11.51 |
| cg13055001 | PPP1CA   | 11 | rs1638566  | POLD4     | 11 | 11.47 |
| cg00292662 | LGALS1   | 22 | rs929039   | LGALS1    | 22 | 11.43 |
| cg00292662 | LGALS1   | 22 | rs4820294  | LGALS1    | 22 | 11.43 |
| cg00292662 | LGALS1   | 22 | rs713835   | PDXP      | 22 | 11.43 |

**Table S9B. Top One Hundred mQTLs in Caucasian Subjects**

| <b>CpG locus</b> | <b>CpG Gene Symbol</b> | <b>CpG Chr</b> | <b>SNP Symbol</b> | <b>SNP Gene Symbol</b> | <b>SNP Chr</b> | <b>P value (-log)</b> |
|------------------|------------------------|----------------|-------------------|------------------------|----------------|-----------------------|
| cg19766460       | C21orf128              | 21             | rs1571737         | UMODL1                 | 21             | 18.11                 |
| cg14893161       | FLJ32569               | 1              | rs708727          | SLC41A1                | 1              | 15.87                 |
| cg21717724       | PSMD5                  | 9              | rs12343516        | PSMD5                  | 9              | 14.52                 |
| cg06210526       | CYP2F1                 | 19             | rs1709112         | CYP2F1                 | 19             | 14.51                 |
| cg06210526       | CYP2F1                 | 19             | rs1709084         | CYP2A13                | 19             | 14.51                 |
| cg21717724       | PSMD5                  | 9              | rs10760117        | PSMD5                  | 9              | 14.46                 |
| cg05740244       | LDHC                   | 11             | rs4757662         | LDHC                   | 11             | 14.40                 |
| cg23855392       | MTHFS                  | 15             | rs7167420         | C15orf37               | 15             | 14.30                 |
| cg14633704       | HSD17B3                | 9              | rs4742910         | HSD17B3                | 9              | 14.16                 |
| cg14893161       | FLJ32569               | 1              | rs708724          | RAB7L1                 | 1              | 13.81                 |
| cg06210526       | CYP2F1                 | 19             | rs12460494        | CYP2A13                | 19             | 13.79                 |
| cg14633704       | HSD17B3                | 9              | rs9299367         | HSD17B3                | 9              | 13.38                 |
| cg14633704       | HSD17B3                | 9              | rs4743713         | HSD17B3                | 9              | 13.38                 |
| cg14159672       | FLJ32569               | 1              | rs708727          | SLC41A1                | 1              | 13.36                 |
| cg17749961       | LYCAT                  | 2              | rs829689          | LYCAT                  | 2              | 13.20                 |
| cg12339802       | C1orf109               | 1              | rs11264091        | EPHA10                 | 1              | 13.01                 |
| cg17749961       | LYCAT                  | 2              | rs1723167         | LYCAT                  | 2              | 13.00                 |
| cg17749961       | LYCAT                  | 2              | rs1662955         | LYCAT                  | 2              | 13.00                 |
| cg21717724       | PSMD5                  | 9              | rs4837796         | PSMD5                  | 9              | 12.80                 |
| cg19767249       | DCPS                   | 11             | rs1893352         | TIRAP                  | 11             | 12.72                 |
| cg25729068       | MTAC2D1                | 14             | rs1884841         | TC2N                   | 14             | 12.58                 |
| cg25729068       | MTAC2D1                | 14             | rs2402074         | TC2N                   | 14             | 12.58                 |
| cg10237469       | CEACAM4                | 19             | rs10410147        | CEACAM8                | 19             | 12.07                 |
| cg09553448       | NUP214                 | 9              | rs353512          | C9orf58                | 9              | 11.94                 |
| cg09553448       | NUP214                 | 9              | rs353513          | C9orf58                | 9              | 11.94                 |
| cg18885346       | PKHD1                  | 6              | rs9357723         | PKHD1                  | 6              | 11.88                 |
| cg14159672       | FLJ32569               | 1              | rs708724          | RAB7L1                 | 1              | 11.86                 |
| cg02196730       | MTHFS                  | 15             | rs7167420         | C15orf37               | 15             | 11.83                 |
| cg25427638       | CYP2A7                 | 19             | rs10409701        | CYP2B6                 | 19             | 11.82                 |
| cg10237469       | CEACAM4                | 19             | rs11671846        | CXCL17                 | 19             | 11.79                 |
| cg14141399       | HAS1                   | 19             | rs11672222        | HAS1                   | 19             | 11.71                 |
| cg18885346       | PKHD1                  | 6              | rs2184460         | PKHD1                  | 6              | 11.66                 |
| cg21832243       | TTC3                   | 21             | rs1015549         | TTC3                   | 21             | 11.63                 |
| cg08679985       | KLF17                  | 1              | rs1291051         | LOC644743              | 1              | 11.42                 |
| cg05089968       | MGC35308               | 6              | rs10946158        | SFT2D1                 | 6              | 11.35                 |
| cg19766460       | C21orf128              | 21             | rs11203184        | C21orf128              | 21             | 11.33                 |
| cg25729068       | MTAC2D1                | 14             | rs3783829         | TC2N                   | 14             | 11.28                 |
| cg27519424       | HLCS                   | 21             | rs8132470         | DSCR6                  | 21             | 11.28                 |

|            |           |    |            |           |    |       |
|------------|-----------|----|------------|-----------|----|-------|
| cg24857721 | RHD       | 1  | rs873308   | TMEM57    | 1  | 11.28 |
| cg25729068 | MTAC2D1   | 14 | rs4904818  | TC2N      | 14 | 11.24 |
| cg17749961 | LYCAT     | 2  | rs1612616  | LYCAT     | 2  | 11.17 |
| cg05089968 | MGC35308  | 6  | rs4144886  | SFT2D1    | 6  | 11.16 |
| cg14893161 | FLJ32569  | 1  | rs823130   | NUCKS1    | 1  | 11.15 |
| cg04616566 | THSD4     | 15 | rs8041918  | THSD4     | 15 | 11.13 |
| cg14893161 | FLJ32569  | 1  | rs823105   | SLC45A3   | 1  | 11.13 |
| cg10281770 | WDR45L    | 17 | rs4789817  | WDR45L    | 17 | 11.12 |
| cg23855989 | AQP5      | 12 | rs3759129  | AQP5      | 12 | 11.10 |
| cg24857721 | RHD       | 1  | rs10903129 | TMEM57    | 1  | 11.05 |
| cg20389709 | KLF11     | 2  | rs3885668  | KLF11     | 2  | 11.03 |
| cg21717724 | PSMD5     | 9  | rs10760112 | MEGF9     | 9  | 11.02 |
| cg00750606 | CDA       | 1  | rs1890005  | CDA       | 1  | 10.98 |
| cg01889448 | HLA-DQB1  | 6  | rs1063355  | HLA-DQB1  | 6  | 10.89 |
| cg08679985 | KLF17     | 1  | rs600450   | KLF17     | 1  | 10.80 |
| cg08679985 | KLF17     | 1  | rs663818   | KLF17     | 1  | 10.80 |
| cg10237469 | CEACAM4   | 19 | rs11666835 | CEACAM1   | 19 | 10.78 |
| cg10237469 | CEACAM4   | 19 | rs10402677 | CEACAM1   | 19 | 10.78 |
| cg10237469 | CEACAM4   | 19 | rs16975865 | CEACAM1   | 19 | 10.78 |
| cg14893161 | FLJ32569  | 1  | rs823096   | NUCKS1    | 1  | 10.78 |
| cg10237469 | CEACAM4   | 19 | rs1859341  | CEACAM8   | 19 | 10.78 |
| cg10281770 | WDR45L    | 17 | rs11655621 | WDR45L    | 17 | 10.72 |
| cg21167159 | H19       | 11 | rs2067051  | H19       | 11 | 10.69 |
| cg13798376 | DSPG3     | 12 | rs4842515  | KERA      | 12 | 10.59 |
| cg21298523 | NUDT9     | 4  | rs7673763  | NUDT9     | 4  | 10.53 |
| cg14893161 | FLJ32569  | 1  | rs1172198  | SLC45A3   | 1  | 10.49 |
| cg25729068 | MTAC2D1   | 14 | rs11160029 | FBLN5     | 14 | 10.49 |
| cg07455279 | NDUFA3    | 19 | rs11670086 | PRPF31    | 19 | 10.47 |
| cg19767249 | DCPS      | 11 | rs4420285  | RPUSD4    | 11 | 10.44 |
| cg06665322 | GPA33     | 1  | rs2281962  | GPA33     | 1  | 10.41 |
| cg17571291 | BLVRA     | 7  | rs10215155 | BLVRA     | 7  | 10.39 |
| cg13771579 | TCL1B     | 14 | rs1748952  | TCL1B     | 14 | 10.34 |
| cg25427638 | CYP2A7    | 19 | rs3745277  | CYP2B6    | 19 | 10.34 |
| cg00186954 | ST5       | 11 | rs2653601  | C11orf16  | 11 | 10.23 |
| cg08380539 | CTBS      | 1  | rs11164005 | SPATA1    | 1  | 10.21 |
| cg13877915 | ZNF132    | 19 | rs1465789  | ZNF132    | 19 | 10.20 |
| cg04616566 | THSD4     | 15 | rs1501422  | THSD4     | 15 | 10.15 |
| cg12339802 | C1orf109  | 1  | rs768659   | CDCA8     | 1  | 10.12 |
| cg18151487 | ARL3      | 10 | rs10786705 | SFXN2     | 10 | 10.11 |
| cg04616566 | THSD4     | 15 | rs17737742 | THSD4     | 15 | 10.03 |
| cg21832243 | TTC3      | 21 | rs1003719  | TTC3      | 21 | 9.95  |
| cg20022541 | C14orf152 | 14 | rs971618   | C14orf152 | 14 | 9.95  |

|            |          |    |            |         |    |      |
|------------|----------|----|------------|---------|----|------|
| cg20203395 | MGC33648 | 5  | rs1573998  | MIER3   | 5  | 9.94 |
| cg20203395 | MGC33648 | 5  | rs2441132  | MIER3   | 5  | 9.94 |
| cg20389709 | KLF11    | 2  | rs7632     | KLF11   | 2  | 9.92 |
| cg08380539 | CTBS     | 1  | rs15911    | CTBS    | 1  | 9.91 |
| cg00799727 | MAGEA11  | 23 | rs916016   | MAGEA11 | 23 | 9.89 |
| cg21167159 | H19      | 11 | rs4930103  | H19     | 11 | 9.85 |
| cg27535305 | SCP2     | 1  | rs11206043 | SCP2    | 1  | 9.81 |
| cg06509940 | CD80     | 3  | rs4330287  | ADPRH   | 3  | 9.81 |
| cg06873352 | LYK5     | 17 | rs2665833  | PSMC5   | 17 | 9.76 |
| cg06873352 | LYK5     | 17 | rs2584624  | FTSJ3   | 17 | 9.76 |
| cg13798376 | DSPG3    | 12 | rs10859103 | KERA    | 12 | 9.71 |
| cg13798376 | DSPG3    | 12 | rs2735333  | KERA    | 12 | 9.71 |
| cg22825487 | VNN3     | 6  | rs6942306  | VNN3    | 6  | 9.68 |
| cg14159672 | FLJ32569 | 1  | rs823105   | SLC45A3 | 1  | 9.66 |
| cg10281770 | WDR45L   | 17 | rs3826310  | WDR45L  | 17 | 9.63 |
| cg10735607 | TMEM109  | 11 | rs7107068  | PRPF19  | 11 | 9.58 |
| cg17829936 | TAAR5    | 6  | rs7765655  | TAAR6   | 6  | 9.54 |
| cg15028436 | TXNDC3   | 7  | rs2722333  | TXNDC3  | 7  | 9.51 |
| cg15028436 | TXNDC3   | 7  | rs2598053  | TXNDC3  | 7  | 9.51 |
